# Supplementary material for: Identification of Qk as a Glial Precursor Cell Marker that Governs the Fate Specification of Neural Stem Cells to a Glial Cell Lineage
Source: PubMed Central journal article supplement — Stem Cell Reports. 2020 Sep 24;15(4):883–97. doi: 10.1016/j.stemcr.2020.08.010 (PMC7562946; doi:10.1016/j.stemcr.2020.08.010), 2020-09-24
Supplement: mmc2.pdf [file mmc2.pdf]

# Identification of Qk as a Glial Precursor Cell Marker that Governs the Fate Specification of Neural Stem Cells to a Glial Cell Lineage

Akihide Takeuchi,<sup>1,\*</sup> Yuji Takahashi,<sup>1</sup> Kei Iida,<sup>1,2</sup> Motoyasu Hosokawa,<sup>1</sup> Koichiro Irie,<sup>3</sup> Mikako Ito,<sup>4</sup> J.B. Brown,<sup>5</sup> Kinji Ohno,<sup>4</sup> Kinichi Nakashima,<sup>3</sup> and Masatoshi Hagiwara<sup>1</sup>

<sup>1</sup>Department of Anatomy and Developmental Biology, Graduate School of Medicine, Kyoto University, Sakyo-ku, Kyoto 606-8501, Japan

<sup>2</sup>Medical Research Support Center, Graduate School of Medicine, Kyoto University, Sakyo-ku, Kyoto 606-8501, Japan

<sup>3</sup>Department of Stem Cell Biology and Medicine, Graduate School of Medical Sciences, Kyushu University, Higashi-ku, Fukuoka 812-8582, Japan

<sup>4</sup>Division of Neurogenetics, Center for Neurological Diseases and Cancer, Nagoya University Graduate School of Medicine, Nagoya 466-8550, Japan

<sup>5</sup>Laboratory for Molecular Biosciences, Life Science Informatics Research Unit, Graduate School of Medicine, Kyoto University, Sakyo-ku, Kyoto 606-8501, Japan

\*Correspondence: [takeuchi.ahide.8r@kyoto-u.ac.jp](mailto:takeuchi.ahide.8r@kyoto-u.ac.jp)

<https://doi.org/10.1016/j.stemcr.2020.08.010>

## SUMMARY

During brain development, neural stem cells (NSCs) initially produce neurons and change their fate to generate glias. While the regulation of neurogenesis is well characterized, specific markers for glial precursor cells (GPCs) and the master regulators for gliogenesis remain unidentified. Accumulating evidence suggests that RNA-binding proteins (RBPs) have significant roles in neuronal development and function, as they comprehensively regulate the expression of target genes in a cell-type-specific manner. We systematically investigated the expression profiles of 1,436 murine RBPs in the developing mouse brain and identified quaking (Qk) as a marker of the putative GPC population. Functional analysis of the NSC-specific *Qk*-null mutant mouse revealed the key role of *Qk* in astrocyte and oligodendrocyte generation and differentiation from NSCs. Mechanistically, *Qk* upregulates gliogenic genes via quaking response elements in their 3' untranslated regions. These results provide crucial directions for identifying GPCs and deciphering the regulatory mechanisms of gliogenesis from NSCs.

## INTRODUCTION

In early embryonic stages, multipotent neural stem cells (NSCs) generate only neurons, while in later stages they halt neurogenesis and shift to gliogenesis, namely the production of astrocytes and oligodendrocytes (OLs). Fate change and transition timing of pluripotent NSCs to neurogenesis are regulated by the master bHLH (basic-helix-loop-helix) transcription factors of *Hes1/Hes5* (Hairy and enhancer of split 1/5), *Asc1*, and *Neurog2* (Neurogenin 2) (Imayoshi and Kageyama, 2014). In addition, epigenetic regulators, such as the polycomb group (PcG) complex (Corley and Kroll, 2015) or *Hmga1/2* (high-mobility-group AT-hook 1/2) (Ozturk et al., 2014), and Notch signaling are essential for neurogenesis. In contrast, the regulation of gliogenesis is unresolved. PcG complex, *Hmga2*, and fibroblast growth factor (FGF) signaling are required for fate transition of NSCs from neuro- to gliogenesis (Bronstein et al., 2017; Dinh Duong et al., 2019; Hirabayashi et al., 2009). However, studies to identify parallel mechanisms for gliogenesis, particularly gliogenic gene regulation, have yet to be successful (Imayoshi and Kageyama, 2014), suggesting an elusive molecular mechanism for gliogenesis other than transcription factor regulation. Furthermore, no marker for a common glial precursor cell (GPC; or a bipotent OL-astrocyte glial-restricted precursor cell) of the two glial cell types has been identified (Rowitch and Kriegstein, 2010), leaving unanswered questions regarding the regulation of gliogenesis.

Accumulating evidence suggests that RNA-binding proteins (RBPs) play significant roles in brain development. RBPs directly bind to target mRNAs via consensus sequences and comprehensively regulate the expression of target genes in functional clusters called “regulons” (Keene, 2007; Takeuchi et al., 2018). RBPs generate spatially and temporally regulated gene expression patterns in a cell-type-specific manner and regulate fate specification and differentiation of cells in neuronal tissues (Gerstberger et al., 2014; Kapeli and Yeo, 2012; Lennox et al., 2018). In this study, we focused on RBPs and identified *Qk* as a novel GPC marker and a key regulator of gliogenesis. *Qk* has long been known to regulate OL differentiation, based on research conducted on viable quaking-hypomorphic mutant mice (*qkv*) (Chenard and Richard, 2008). To our knowledge, this is the first report to indicate that *Qk* is required for comprehensive gliogenic gene expression, therefore making it essential for inducing GPCs from NSCs. The findings indicate the broader impact of *Qk* on gliogenesis in its entirety and have redefined the overall picture of glial cell development from NSCs.

## RESULTS

### Identification of RBPs Highly Expressed in NSCs yet Shut Off after Neural Differentiation

Given that a certain population of RBPs show tissue-, cell-, and spatiotemporal-specific expression patterns, we

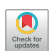

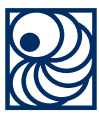

aimed to identify a novel RBP marker of GPCs that could potentially be the essential regulator of GPC genesis from NSCs. Master transcription factors that induce neuronal differentiation are expressed both in NSCs and in differentiating neurons, but not in glial cell lineages (Imayoshi and Kageyama, 2014). Hence, we aimed to identify RBPs that are highly expressed in NSCs with no expression in neuronal cell lineages. For this purpose, we utilized laser capture microdissection to separate the developing cerebral cortex into NSC- and neuron-specific areas: the ventricular zone (VZ) and the cortical plate (CP) that arises from the VZ, respectively. Next, RNA was extracted from these regions and a transcriptome analysis was carried out using the GeneChip Mouse Exon 1.0 ST Array (Figure 1A). Compared with RNA sequencing (RNA-seq), array-based transcriptome assays require a reduced amount of RNA with linear amplification, making this technique suitable for the limited sample volumes recovered from specific regions of embryonic brains or laser-captured specimens. In our transcriptome study, *Pax6* (paired box 6), *Neurog1/2*, *Hes5*, and *Gli3* showed NSC-enriched expression (fold change [FC] in neuron/NSC <0.1,  $p < 0.01$ ), and *Reln* (*reelin*), *CamK* ( $Ca^{2+}$ /calmodulin-dependent protein kinase) family members, glutamate receptors, ion channels, and cadherins demonstrated neuron-enriched expression (FC in neuron/NSC >5.0,  $p < 0.01$ ), indicating the successful separation of NSC- and neuron-specific genes. Using these transcriptome data, we identified NSC-enriched RBPs with expression significantly higher than in neurons (FC in neuron/NSC <0.33,  $p < 0.01$ ) (Figure 1B). By referencing a database containing the tissue-specific expression profiles of 1,542 human RBPs (Gerstberger et al., 2014), we further characterized the selective expression of the NSC-enriched RBPs in neural tissues. Among all identified NSC-enriched RBPs, *Qk* was the most abundantly expressed in NSCs and was selectively expressed in fetal and adult brains (Figure 1B, fetal and adult brain indices), suggesting its specific role in neural development or in brain-specific cells. Next, we histologically examined QK expression in the E15.5 cerebral cortex. QK expression was detected in the VZ, where it was positively stained with bromodeoxyuridine (BrdU). QK expression was negative above the VZ, where Tuj1-positive neurons that had differentiated from NSCs were accumulated (Figure 1C). These results indicate that the laser capture microdissection and transcriptome study successfully identified a candidate RBP with potential to be a marker or regulator of GPCs.

### Loss of *Qk* Causes Severe Brain Atrophy with Hypomyelination in *Qk*-Null Brains

We next investigated the function of *Qk* in gliogenesis. During embryogenesis, QK is selectively expressed in the VZ; in neuronal cells, its expression is lost (Figure 1C). In

histological examination at P0, QK was expressed throughout the VZ (or ependymal layer). QK was also densely expressed in the intermediate zone/subventricular zone (IZ/SVZ), especially in regions close to the VZ, and sparsely in the CP, with a gradient of high apical density to low basal density (Figure 2A). This expression pattern suggests that QK is expressed in the early GPC population, which is differentiated from NSCs and migrates from the stem cell niche into the IZ/SVZ and later to the cortical layers that harbor more differentiated cells. In addition, QK expression was detected in endothelial and smooth muscle cells of cortical vessels, and in the pia mater in the developing cerebral cortex (Figure 2A), as previously reported (Li et al., 2003).

To elucidate the function of *Qk* in glial cell regulation, we generated conditional knockout (KO) mice for *Qk* (*Qk flox*) (Figure S1) and crossed them with *Nestin-Cre* mice to delete the floxed *Qk* gene in both NSCs and their offspring cells. *Qk*-KO embryos were obtained at E18.5, 1 day before birth, with the expected Mendelian ratio, exhibiting no detectable abnormalities in brain morphology. In histological analysis, no gross abnormalities were detected in structure or cellular distribution; the thicknesses of the VZ and the CP in the developing cortex of the *Qk*-KO brain were comparable to those of the control (Cont) brain (Figure 2B), indicating that the loss of *Qk* in NSCs does not cause severe defects in brain formation during the embryonic period. As *Qk* is known to regulate OL production, we further examined the role of *Qk* in generating OLs from NSCs. Expression of the mature OL marker MBP (myelin basic protein) became evident in the wild-type cerebral cortex around P14, particularly in the white matter of the developing cortex and the corpus callosum (Figure 2C, MBP). QK was expressed throughout the cortex at this stage. Co-localization of QK with MBP was detected, indicating that the OLs that form the myelin sheath express QK (Figure 2C, MBP/QK). In P14 *Qk*-KO brains, MBP expression was significantly decreased throughout the brain, including in the corpus callosum, indicating severe hypomyelination of OLs (Figure 2D, *Qk*-KO). These brains exhibit loose cerebral parenchyma with greatly dilated lateral and third ventricles (Figure 2D, *Qk*-KO), indicating that the loss of *Qk* caused hypomyelination with severe brain atrophy. In the *quaking viable* (*qkv*) mouse, a spontaneous autosomal recessive *Qk* mutant, hypomorphic *Qk* expression reduced the number of mature OLs in the CNS (Hardy, 1998). These, and our results, indicate that *Qk* is essential for the generation and differentiation of OLs from NSCs.

### QK Is Expressed in Putative GPCs

We further investigated QK-expressing cells via marker analysis, by examining the expression of OLIG2, a bHLH transcription factor that regulates the specification

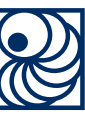

### A Scheme for isolating NSC- and Neuron-specific RBPs

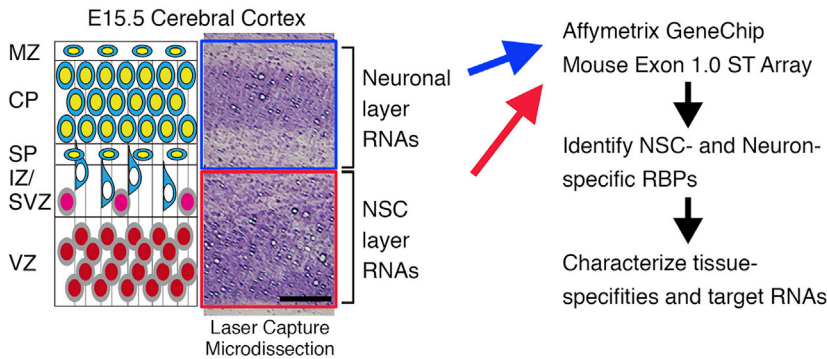

### B Features of NSC-specific RBPs

| Gene ID | Gene Symbol     | Description                                                   | NSC expression level | Neuron expression level | FC   | p-value | Fetal brain index | Adult brain index | Putative target RNA |
|---------|-----------------|---------------------------------------------------------------|----------------------|-------------------------|------|---------|-------------------|-------------------|---------------------|
| 12189   | <i>BRCA1</i>    | breast cancer 1                                               | 1233                 | 195                     | 0.16 | 0.000   | 0.32              | 1.43              | lincRNA             |
| 11810   | <i>APOBEC1</i>  | apolipoprotein B mRNA editing enzyme, catalytic polypeptide 1 | 994                  | 177                     | 0.18 | 0.000   | 1.15              | 0.84              | mRNA                |
| 19317   | <i>Qk</i>       | quaking                                                       | 5101                 | 978                     | 0.19 | 0.000   | 1.39              | 1.42              | mRNA                |
| 26909   | <i>EXO1</i>     | exonuclease 1                                                 | 1103                 | 217                     | 0.20 | 0.000   | 0.34              | 0.60              | RNA/DNA             |
| 66599   | <i>RDM1</i>     | RAD52 motif 1                                                 | 515                  | 115                     | 0.22 | 0.000   | 0.57              | 0.66              | unknown             |
| 12021   | <i>BARD1</i>    | BRCA1 associated RING domain 1                                | 1127                 | 252                     | 0.22 | 0.001   | 0.48              | 0.65              | lincRNA             |
| 74044   | <i>TTF2</i>     | transcription termination factor, RNA polymerase II           | 803                  | 202                     | 0.25 | 0.000   | 0.29              | 0.61              | mRNA                |
| 237082  | <i>NXT2</i>     | nuclear transport factor 2-like export factor 2               | 3465                 | 966                     | 0.28 | 0.000   | 0.66              | 0.52              | mRNA                |
| 67153   | <i>RNASEH2B</i> | ribonuclease H2, subunit B                                    | 3275                 | 927                     | 0.28 | 0.000   | 0.31              | 1.02              | RNA/DNA             |
| 242570  | <i>RAVER2</i>   | ribonucleoprotein, PTB-binding 2                              | 1196                 | 364                     | 0.30 | 0.000   | n/a               | n/a               | mRNA                |

### C

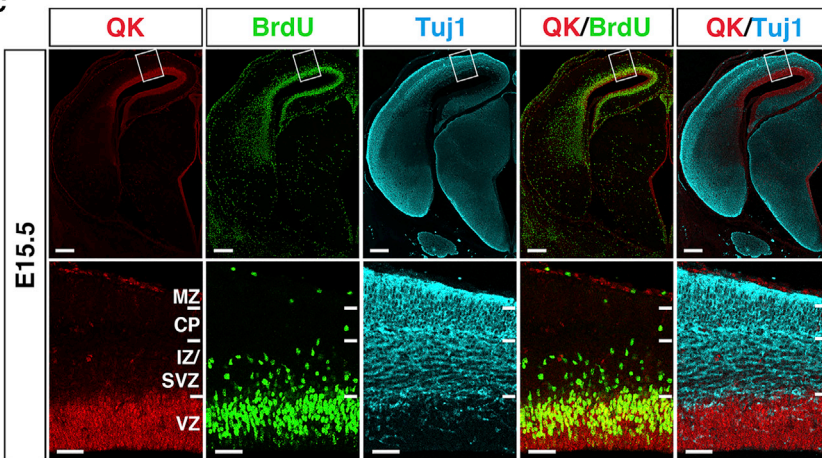

### Figure 1. Identification of RBPs Highly Expressed in NSCs Yet Shut Off After Neural Differentiation

(A) Scheme for extracting RNA from NSC and neuron layers in cerebral cortices using laser capture microdissection and transcriptome analysis with ExonArray. Scale bar, 100  $\mu$ m. Abbreviations: MZ, marginal zone; CP, nascent cortical plate; SP, subplate; IZ/SVZ, intermediate zone/subventricular zone; VZ, ventricular zone.

(B) Identification of NSC-specific RBPs. Mean expression levels in NSC and neuronal layers, fold change (FC) of expression levels between NSC and neuronal layers (neuron/NSC), and p values were calculated (n = 3 each for NSC and neuronal layers). Embryonic and adult brain indices were calculated based on RBP expression levels in human fetal and adult brains and compared against those of other organs (expression level in embryonic or adult brain/mean expression level in other organs) using a human RBP database that covers 1,542 RBPs (Gerstberger et al., 2014). Putative target RNAs are shown.

(C) Co-immunostaining of QK (red), BrdU (green), and Tuj1 (turquoise) in coronal sections of the cranial regions of E15.5 embryos (top). Scale bar, 250  $\mu$ m. Boxed areas are shown at higher magnification in the bottom row. Scale bar, 50  $\mu$ m. Abbreviations are the same as in (A).

and differentiation of NSCs to OL precursor cells (OPCs) (Meijer et al., 2012) and astrocyte progenitors (Marshall et al., 2005). In P0 Cont brains, QK was densely expressed in the VZ (or ependymal layer) (Figure 3A) as previously observed (Figure 2A). In the area above the white line (Figure 3A), scattered QK-expressing cells were well overlapped by OLIG2-positive cells, indicating that QK is expressed in OPCs and astrocyte progenitors. We further examined the expression of the OPC marker platelet-

derived growth factor receptor alpha (PDGF-R $\alpha$ ), which is essential for the proliferation, differentiation, and survival of OPCs (Funa and Sasahara, 2014). PDGF-R $\alpha$ -positive OPCs were detected in the same area as QK and OLIG2 double-positive cells (Figure 3A). Dual immunostaining for QK and PDGF-R $\alpha$  revealed that PDGF-R $\alpha$ -expressing cells were largely positive for QK (Figure 3B), indicating that OPCs express QK. Accumulation of QK-positive cells, negative for OLIG2 and PDGF-R $\alpha$ , was

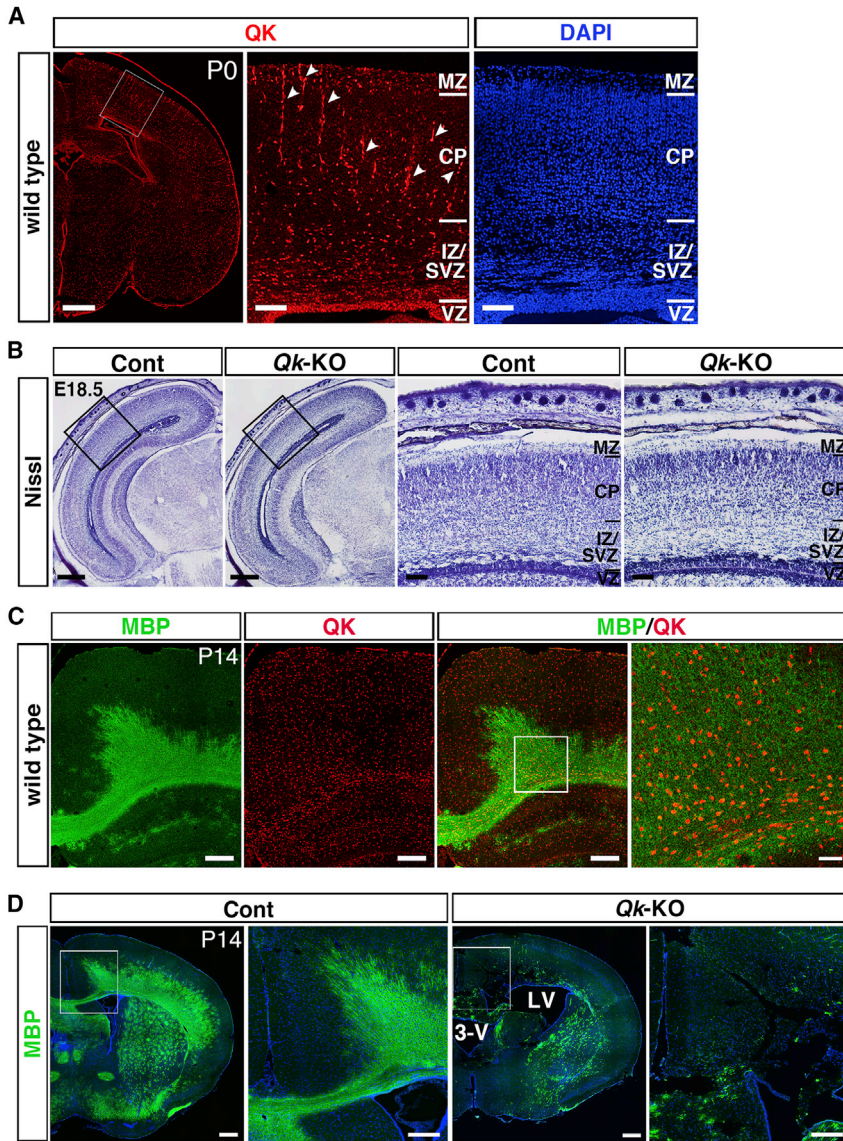

**Figure 2. Loss of *Qk* Causes Severe Brain Atrophy with Hypomyelination in *Qk*-Null Brains**

(A) Immunostaining of QK (red) in coronal sections of P0 brain (leftmost image). Scale bar, 500  $\mu$ m. The boxed area is shown at higher magnification with DAPI counterstaining in the two right images. Arrowheads indicate QK expression in endothelial and smooth muscle cells. Scale bar, 100  $\mu$ m. Abbreviations are the same as in Figure 1A.

(B) Nissl staining of the coronal sections of head regions from E18.5 control (Cont) and *Qk f/f;Nestin-Cre* (*Qk*-KO) embryos. Scale bar, 500  $\mu$ m. Boxed areas in the two left images are shown at higher magnification in the two right images. Scale bar, 100  $\mu$ m. Abbreviations are the same as in Figure 1A.

(C) Co-immunostaining of MBP (green) and QK (red) in coronal sections of P14 wild-type cortex (three left images). Scale bar, 250  $\mu$ m. The boxed area in the left MBP/QK image is shown at higher magnification in the rightmost image. Scale bar, 50  $\mu$ m.

(D) Immunostaining of MBP in the coronal sections of the P14 brain from Cont and *Qk*-KO mice (two left images). Scale bar, 500  $\mu$ m. Boxed areas indicated in Cont and *Qk*-KO cortices are shown at higher magnification in the image to their immediate right. Scale bar, 250  $\mu$ m. Abbreviations: 3-V, third ventricle; LV, lateral ventricle.

detected between the VZ and the OLIG2-positive cell layers (Figure 3A). As no markers for the GPC population have been identified, it could not be definitively concluded that these cells were, in fact, GPCs. However, considering that QK expression is lost in neuronal cell lineages after they differentiate from NSCs, these data strongly suggest that NSC-derived GPCs express QK and further differentiate into OPCs and, presumably, astrocyte progenitors. Next, we examined the expression of known glial progenitor markers in these putative GPC populations using anti-CNP (2',3'-cyclic nucleotide 3'-phosphodiesterase) and anti-NG2 antibodies. CNP is expressed during OL development (Groteklaes et al., 2020). In P0, CNP expression was not observed in the developing cor-

tex (Figure S2A), and was weakly detected in the corpus callosum of P7 cortex (Figure S2B), consistent with a previous report. NG2 proteoglycan (the product of the *CSPG4* [chondroitin sulfate proteoglycan 4] gene) is the OL lineage marker (Nishiyama et al., 2009), and recent studies suggest multipotency of NG2 cells (Tsoa et al., 2014). In P0 brains, a small number of NG2-positive cells showing highly branched morphology were scattered, while the vascular cells in the brain parenchyma were highly positive (Figure S2C), as was previously reported. Whereas QK expression overlapped with these NG2 cells, the vast majority of putative GPCs did not express NG2, which is consistent with the observation indicating that NG2 is expressed later than PDGF-R $\alpha$  (Nishiyama et al.,

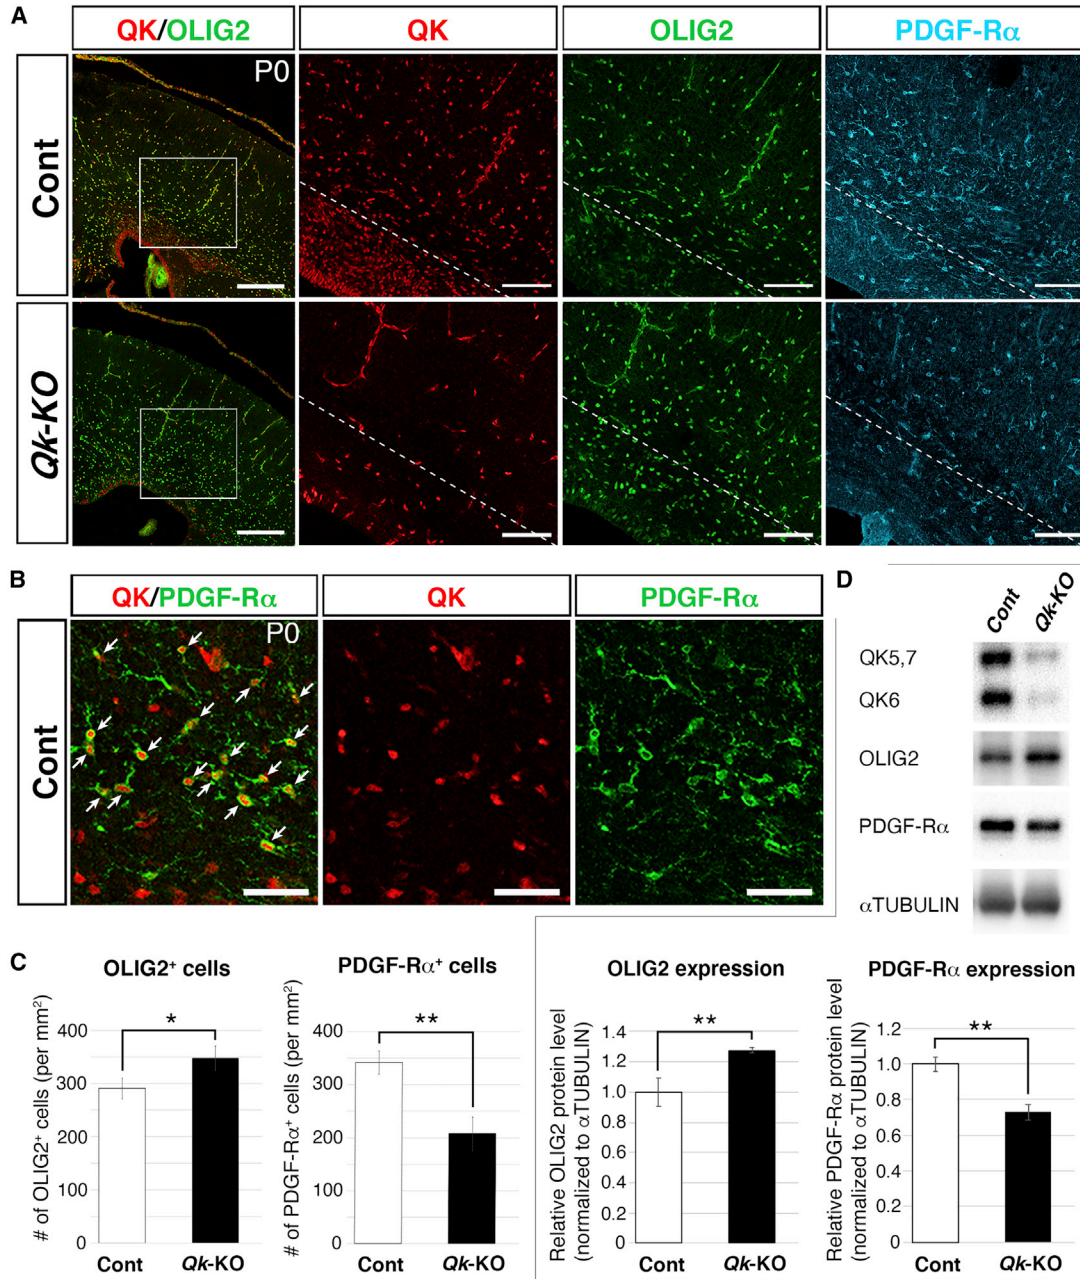

### Figure 3. QK Is Expressed in Putative GPCs

(A) Co-immunostaining of QK (red) and OLIG2 (green) in coronal sections of P0 cortices from control (Cont) (upper leftmost) and *Qk*-KO (lower leftmost) mice. Scale bar, 250  $\mu$ m. The boxed areas in QK/OLIG2 images are shown at higher magnification in the three images to their right. PDGF-R $\alpha$  labeling was performed using adjacent sections. The white line in Cont demarks the area where QK-positive/OLIG2-negative cells accumulated (lower left) and the area where QK-positive/OLIG2-positive cells scattered (upper right). The white line in *Qk*-KO corresponds to the area in Cont. Scale bar, 100  $\mu$ m.

(B) Co-immunostaining of QK (red) and PDGF-R $\alpha$  (green) in coronal section of P0 Cont cortex. Arrows indicate QK/PDGF-R $\alpha$  double-positive cells. Scale bar, 50  $\mu$ m.

(C) The number of OLIG2<sup>+</sup> and PDGF-R $\alpha$ <sup>+</sup> cells in P0 cortices is shown (n = 3 in each genotype). Data are presented as mean  $\pm$  SD. \*p < 0.05 and \*\*p < 0.01 (Student's t test).

(legend continued on next page)

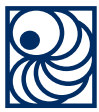

2009). Overall, these results indicate that QK is a good marker for the earlier GPC population that still does not express CNP and NG2.

We further analyzed the progenitors of astrocytes and OPCs in P0 *Qk*-KO brains. The number of QK-expressing cells was greatly reduced and the remaining Qk expression was primarily detected in the endothelial and smooth muscle cells of cortical vessels (Figure 2A). As the efficiency of Cre-induced inversion and inactivation of *Lox66/Lox71* via the FlipRosa $\beta$ geo trapping vector (Schnutgen et al., 2005) is known to be lower than Cre-induced excision of *LoxP* floxed alleles (Oberdoerffer et al., 2003), we were able to detect the remaining QK-expressing cells in which the *Qk* gene was not inactivated in Nestin-Cre-expressing NSCs. The distribution of OLIG2-positive cells in *Qk*-KO cortices was slightly, yet significantly, increased compared with Cont (Figures 3A and 3C). Western blotting (WB) of Cont and *Qk*-KO cortices confirmed disruption of QK expression in *Qk*-KO cortices. Meanwhile, total OLIG2 protein expression in *Qk*-KO cortices was slightly, yet significantly, increased compared with Cont (Figure 3D), suggesting a compensatory mechanism triggered by decreased number of OLs. In contrast, expression of PDGF-R $\alpha$  was significantly downregulated in *Qk*-KO cortices compared with Cont (Figures 3A and 3C), and total PDGF-R $\alpha$  protein expression in *Qk*-KO cortices was significantly downregulated compared with Cont (Figure 3D). Although we detected CNP expression in OLs within the corpus callosum in P7 Cont, it became much weaker in P7 *Qk*-KO (Figure S2B). In addition, NG2 cells were nearly absent from P0 *Qk*-KO cortices (Figure S2D). These data indicate that loss of *Qk* failed to induce PDGF-R $\alpha$ -positive OPCs from NSCs, subsequently decreasing the number of OLs and causing severe hypomyelination (Figure 2D). As expression of OLIG2 precedes PDGF-R $\alpha$  in OPCs (Stolt et al., 2002), it is postulated that OLIG2-positive glial progenitors were generated from NSCs in *Qk*-KO brains; however, these cells had already lost their ability to differentiate into PDGF-R $\alpha$ -positive OPCs.

As the expression profiling of QK<sup>+</sup> cells suggested QK as a good marker of the GPC population, we broadened our analysis and evaluated QK-expressing cells (irrespective of the type) using single-cell transcriptomic data reported in the context of developing mouse neocortex (Loo et al., 2019). In P0, QK-expressing cell populations include immature astrocytes (including GPCs and astrocyte progenitors), OLs (OPCs), endothelial cells, and choroid plexus cells (Figures S3A and S3B), in line with our immunohistochemistry studies. Of note, QK expression was

also detected in the microglia and interneurons; thus we further analyzed the distribution of these cells. QK expression was detected in IBA1 (induction of brown adipocytes 1)-positive cells in the pia mater and in the septal area, but not in the IZ/SVZ (Figure S3C, Cont), consistent with the recent findings that brain microglia originates from embryonic mesenchymal cells in the pia or from fetal macrophages in the yolk sac (for more details, please see the review by Mosser et al., 2017) and these microglia express QK. Interneurons are known to be generated in the VZ of the medial ganglionic eminence and to migrate tangentially into the CP. In this study, a weak QK expression was detected in the subpallium, where GAD65/GAD67 (glutamic acid decarboxylase-65 and -67)-positive cells were accumulating, suggesting that QK is expressed by interneurons (Figure S3D, subpallium in Cont). However, we did not observe QK expression in migrating interneurons in the CP (Figure S3D, CP in Cont). Overall these data suggest that newly generated interneurons express QK but then lose its expression during differentiation, similar to that observed for cortical neurons (Figure 1C). Altogether, these results attest that QK is a novel marker of the early GPC population; a substantial number of cells in the IZ/SVZ still negative for OLIG2, PDGF-R $\alpha$ , CNP, and NG2 can be identified via QK (Figures 3A, 3B, S2, and S3E).

#### QK Is Expressed in Astrocyte Progenitor Cells, and Loss of *Qk* Impairs Astrocyte Generation from NSCs

We next investigated whether QK is expressed in astrocyte progenitor cells and is involved in astrocyte genesis. We utilized acyl-CoA synthetase bubblegum family member 1 (ACSBG1) as an astrocyte marker, as it is specifically expressed in astrocytes and their progenitors (Cahoy et al., 2008). In expression analyses of wild-type cerebral cortices, ACSBG1 expression became evident near P3 and was detected throughout the cortex, particularly in cortical gray matter (Figure 4A). Scattered QK-positive cells in the CP were more prevalent at P3 than P0 and were uniformly detected throughout the cortex (Figure 4A), suggesting the migration and proliferation of QK-positive cells from the VZ to the developing CP. Moreover, ACSBG1-expressing cells were largely positive for QK (Figure 4A), indicating that astrocyte progenitor cells express QK.

Next, we investigated the generation of astrocytes in *Qk*-KO brains. In P3 *Qk*-KO brains, ACSBG1 expression was downregulated throughout the cortex, which was confirmed by the significantly reduced number of ACSBG1-positive cells (Figure 4B). Disruption of QK expression and significant downregulation of ACSBG1

(D) Representative results of WB for QK, OLIG2, PDGF-R $\alpha$ , and  $\alpha$ -TUBULIN in P0 cortices from Cont and *Qk*-KO mice. Signal intensities of OLIG2 and PDGF-R $\alpha$  in WB were quantified by densitometry, normalized by  $\alpha$ -tubulin, and indicated using a bar graph ( $n = 3$  in each genotype). Data are presented as mean  $\pm$  SD. \*\* $p < 0.01$  (Student's  $t$  test).

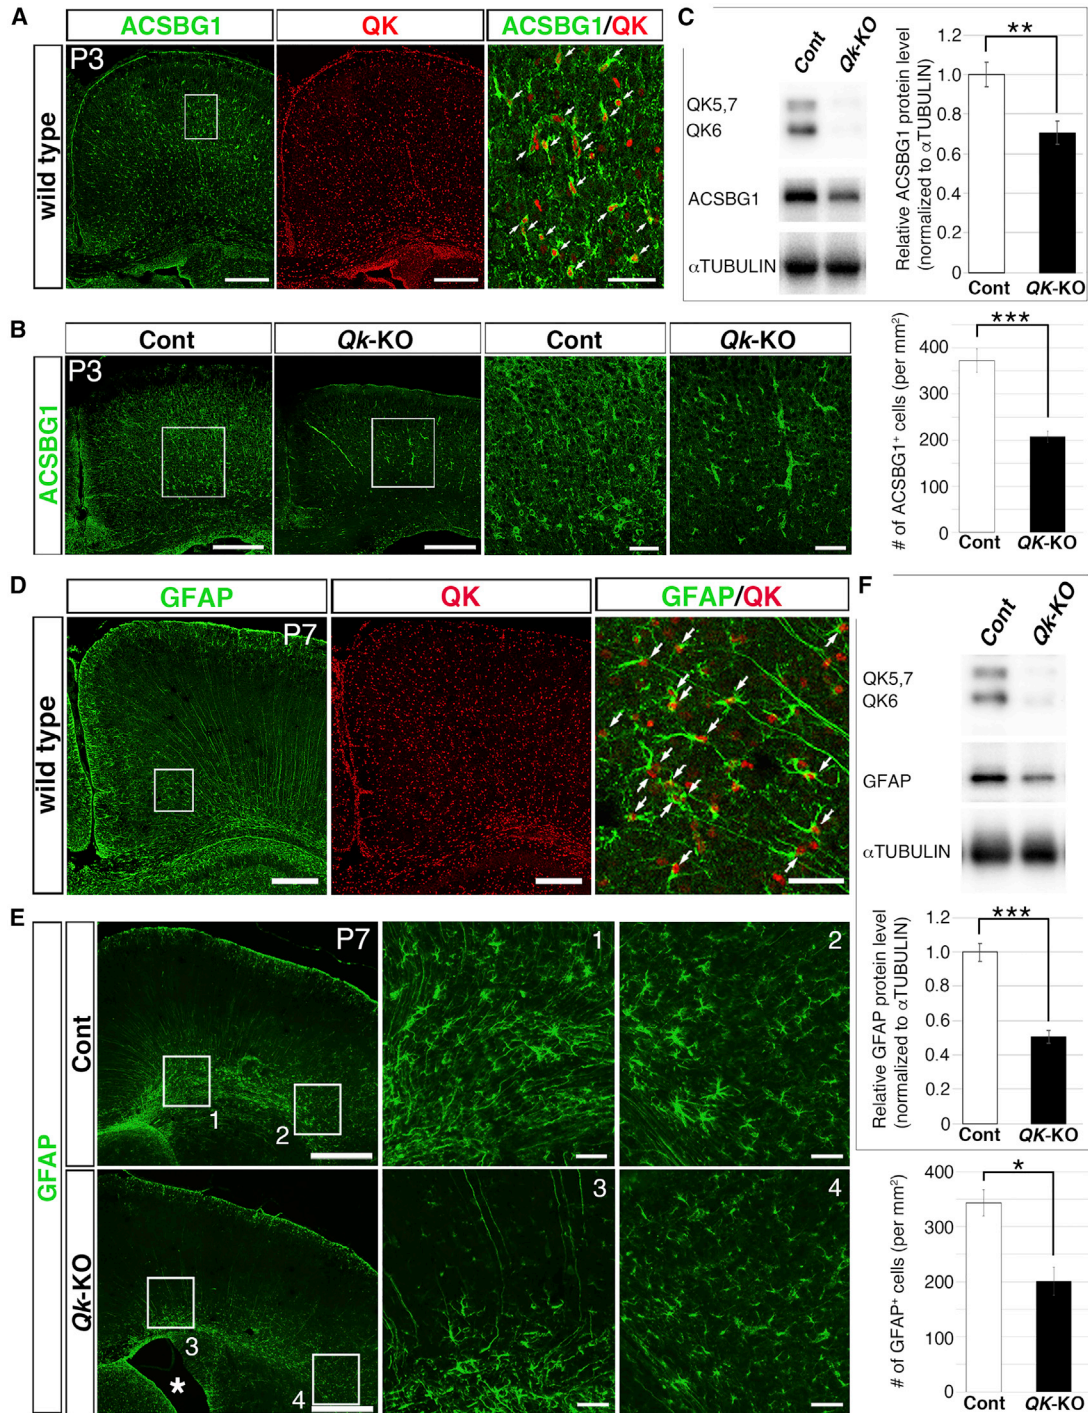

**Figure 4. Qk Is Expressed in Astrocyte Progenitor Cells, and Loss of *Qk* Impairs Astrocyte Generation from NSCs**

(A) Co-immunostaining of ACSBG1 (green) and Qk (red) in the coronal sections of P3 wild-type cortex (left two). The boxed area in the ACSBG1 image is shown at higher magnification in the rightmost image. Arrows indicate cells that are double positive for red (Qk) and green (ACSBG1). Scale bar, 50 μm.

(B) Immunostaining of ACSBG1 in coronal sections of P3 cortices from control (Cont) and *Qk*-KO mice (left two). Scale bar, 250 μm. Boxed areas in Cont and *Qk*-KO mouse cortices are shown at higher magnification in the next two images. Scale bar, 50 μm. The number of ACSBG1<sup>+</sup> cells in P0 cortices is shown using a bar graph in the rightmost image (n = 3 in each genotype). Data are presented as mean ± SD. \*\*\*p < 0.001 (Student's t test).

(legend continued on next page)



protein expression in *Qk*-KO cortices was confirmed by WB (Figure 4C). Hence, the genesis of astrocyte progenitor cells from GPCs was disrupted in *Qk*-KO mouse brains and was analogous to a defect in OL differentiation. To further confirm this hypothesis, we investigated the production of astrocytes by glial fibrillary acidic protein (GFAP) immunostaining. The expression of GFAP in astrocytes became evident in the cerebral cortex around P7, and its expression in radial glial cells was particularly apparent in their radial fibers (Figure 4D). At P7, QK-expressing cells were scattered widely throughout the entire cortex. GFAP-expressing astrocytes were largely positive for QK, indicating that astrocytes express QK.

Next, we examined the phenotype of astrocytes in *Qk*-KO brains. In P7 *Qk*-KO brains, GFAP immunostaining was severely decreased throughout the cortex, which was confirmed by the significantly decreased number of GFAP-positive cells (Figure 4E). We confirmed the disruption of QK expression and significant downregulation of GFAP protein expression in *Qk*-KO cortices by WB (Figure 4F). In *Qk*-KO brains, atrophy of brain parenchyma alongside the expansion of the lateral and third ventricles was detected (Figure 4E). Among several possible explanations for this phenomenon, this may be explained by a loss of astrocytes. Our *Qk*-floxed mice could not completely inactivate the *Qk* genes in VZ by P0, thus we estimated the KO efficacy by counting the remaining QK<sup>+</sup>/OLIG2<sup>+</sup> cells that escaped from Cre-mediated inactivation and comparing with the numbers in Cont. The KO efficacy at P7 cortices was 84.8%; this frequency was larger than that characterizing the decrease of GFAP-positive cells or GFAP protein levels, indicating that the loss of *Qk* did not completely abolish astrocytes at this time point, but significantly disrupted the generation of astrocytes from NSCs. On the other hand, the OL production examined via MBP expression was more severely downregulated, as shown in Figure 2D, thus indicating that *Qk* is indispensable for the generation and maturation of OLs, as previously reported (please see review by Chenard and Richard, 2008). Qk is known

to regulate OL production, as observed in hypomorphic *qkv* mice. However, these studies using NSC-specific null mutant mice for *Qk* revealed the extended role of *Qk* in regulating gliogenesis.

### Qk Is Required for Fate Specification of NSCs to GPCs

As the staining of markers in cells cannot reliably identify whether expression has been completely lost or is downregulated, we established an *in vitro* culture system of NSCs and conducted transcriptome analysis to capture cell fate change. NSCs were isolated from cerebral cortices of *Qk*-KO and Cont mice, and glial differentiation was induced by mimicking *in vivo* gliogenesis (Figure 5A). Prior to induction, we examined the proliferative capability of *Qk*<sup>-/-</sup> NSCs in the presence of basic FGF (bFGF) and no significant difference was observed in proliferation between *Qk*-KO and Cont, consistent with the finding that VZ thickness and neuronal cell production from NSCs were intact in *Qk*-KO brains (Figure 2B). Next, differentiation of NSCs to glial cells was induced using media containing 10% fetal bovine serum but lacking bFGF. Cont NSCs expressed the stem cell marker SOX2 on day 1; however, they began to express ACSBG1 on day 2 and GFAP on day 4, indicating successful astrocyte differentiation from NSCs (Figure 5B). *Qk*-KO NSCs also expressed SOX2 on day 1; however, expression of ACSBG1 and GFAP was much lower than in Cont NSCs (Figure 5B), consistent with our earlier findings in *Qk*-KO brains. Quantitative analysis indicated fewer GFAP-positive cells in *Qk*-KO NSCs than in Cont NSCs, although total cell numbers were comparable (Figure 5C), supporting our hypothesis that loss of *Qk* inhibited NSC differentiation into GFAP-positive astrocytes without causing cell loss.

Hypothesizing that Qk is required for fate specification of NSCs to GPCs, we carried out a transcriptome analysis at an early time point, 24 h after inducing glial differentiation (day 1). To comprehensively detect transcriptomic changes in differentiating *Qk*<sup>-/-</sup> NSCs, we performed gene set enrichment analysis (GSEA), which uses statistical approaches to identify significantly enriched or depleted groups of genes. We referenced the cell-type-specific

(C) Representative results of WB for QK, ACSBG1, and  $\alpha$ -TUBULIN in P3 cortices from control and *Qk*-KO mice. Signal intensities of ACSBG1 were quantified by densitometry ( $n = 3$  in each genotype), normalized by  $\alpha$ -TUBULIN, and indicated using a bar graph. Data are presented as mean  $\pm$  SD. \*\* $p < 0.01$  (Student's *t* test).

(D) Co-immunostaining of GFAP (green) and QK (red) in coronal sections of the P7 wild-type cortex. Scale bar, 250  $\mu$ m. The boxed area in the GFAP image is shown at higher magnification in the rightmost image. Arrows indicate cells that are double positive for red (QK) and green (GFAP). Scale bar, 50  $\mu$ m.

(E) Immunostaining of GFAP in coronal sections of P7 brains from Cont and *Qk*-KO mice (left). Scale bar, 500  $\mu$ m. Asterisk indicates dilated lateral and third ventricles detected in *Qk*-KO brains. The boxed areas in the two left images are shown at higher magnification in the two right images. Scale bar, 50  $\mu$ m. The number of GFAP<sup>+</sup> cells in P7 cortices is shown using a bar graph at the rightmost bottom ( $n = 2$  in each genotype). Data are presented as mean  $\pm$  SD. \* $p < 0.05$  (Student's *t* test).

(F) Representative results of WB for QK, GFAP, and  $\alpha$ -TUBULIN in P7 cortices from Cont and *Qk*-KO mice are shown. Signal intensities of GFAP were quantified by densitometry ( $n = 3$  in each genotype), normalized by  $\alpha$ -tubulin, and indicated using a bar graph. Data are presented as mean  $\pm$  SD. \*\*\* $p < 0.001$  (Student's *t* test).



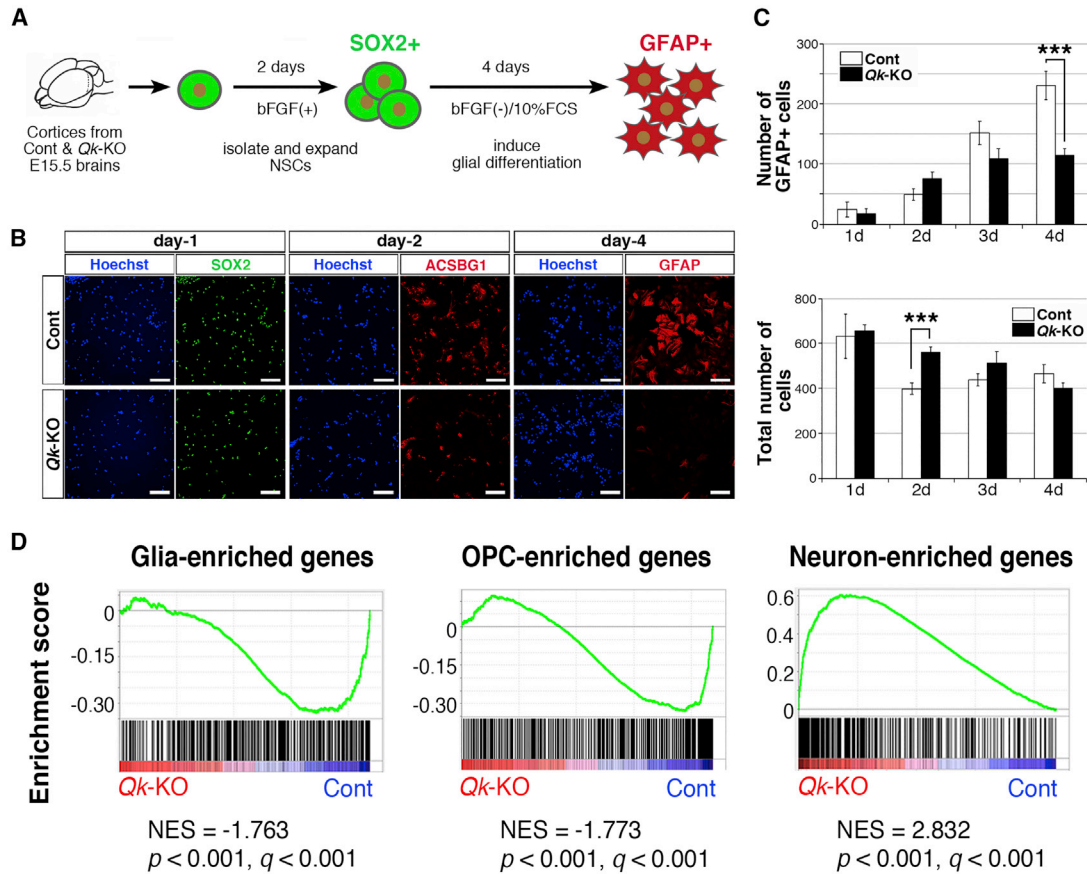

### Figure 5. *Qk* Is Required for the Fate Specification of NSCs to GPCs

(A) Scheme for isolating NSCs from embryonic mouse cortices and inducing differentiation into glial cells *in vitro*.

(B) Expression of SOX2 (green), ACSBG1 (red), and GFAP (red) during glial differentiation of control (Cont) and *Qk*-KO NSCs. Scale bar, 100  $\mu$ m.

(C) GFAP-positive and total cell numbers counted during glial differentiation of Cont and *Qk*-KO NSCs (counted on days 1, 2, 3, and 4 after induced differentiation using four samples from Cont and *Qk*-KO NSCs). Data are represented as the mean  $\pm$  SEM ( $n = 4$  in each genotype, \*\*\* $p < 0.001$  using Student's *t* test).

(D) GSEA plots of Cont and *Qk*-KO NSCs at day 1 after glial differentiation. Differentially expressed genes were analyzed using glia-, OPC-, and neuron-enriched gene sets. NES, normalized enrichment score.

enriched gene lists for astrocytes, OLs, OPCs, glial cells (astrocytes + OPCs + OLs), and neurons (Zhang et al., 2014). GSEA showed that glia- and OPC-enriched genes were induced in Cont NSCs, indicating that Cont NSCs differentiate into GPCs. In contrast, loss of *Qk* significantly downregulated glia- and OPC-enriched genes compared with Cont NSCs (Figure 5D), indicating that marker expression was downregulated rather than completely abolished. Surprisingly, we found that neuron-enriched genes, including several types of neuron-specific genes, were aberrantly upregulated in *Qk*<sup>-/-</sup> NSCs (Figure 5D), suggesting that loss of *Qk* disrupted NSC differentiation to GPCs and instead induced these cells to become neural precursor cells. Together, GSEA results clearly indicate that *Qk* is required for fate specification of NSCs to GPCs.

### *Qk* Upregulates Astrocyte/OL Genes, Cell-Surface Signaling Receptors, and Endocytosis Pathway Genes as Gliogenic Regulons

Next, we attempted to elucidate the molecular function of *Qk* in mRNA regulation of gliogenesis. To specify the target mRNAs of *Qk*, we identified genes with significantly altered expression in *Qk*<sup>-/-</sup> NSCs using the thresholds of FC > 1.5 ( $\log_2$  FC > 0.58) and FC < 0.67 ( $\log_2$  FC < -0.58) with adjusted  $p < 0.01$  in DESeq2; a total of 383 genes were downregulated and 570 genes were upregulated in *Qk*<sup>-/-</sup> NSCs compared with Cont. *Qk* contains RNA-binding motifs known as STAR domains. Several studies using SELEX and CLIP-seq have identified the unique UACUAAH (H = not G) motif as the RNA recognition sequence of *Qk* and designated it the quaking response element (QRE) (Fagg

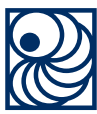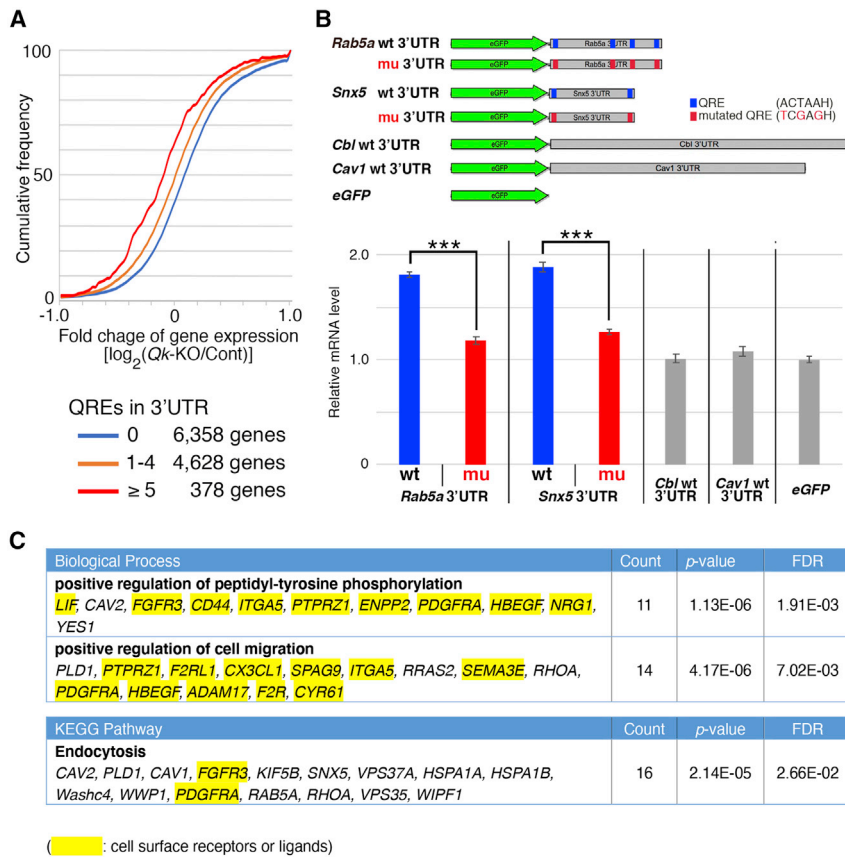

**Figure 6. Qk Upregulates Astrocyte/OL Genes, Cell-Surface Signaling Receptors, and Endocytosis Pathway Genes as Gliogenic Regulators**

(A) The cumulative distribution showing the relationship between changes in mRNA expression of all expressed genes and the presence of QRE in 3' UTRs in control (Cont) and Qk-KO NSCs at day 1 after glial differentiation.

(B) Top: Scheme of 3' UTR reporter vectors expressing *eGFP* cDNA with 3' UTR of *Rab5a* (*Rab5a* wt 3' UTR), *Snx5* (*Snx5* wt 3' UTR), *Cbl* (*Cbl* wt 3' UTR), *Cav1* (*Cav1* wt 3' UTR), or *eGFP* lacking a 3' UTR (*eGFP*). Bottom: Reporter vectors were co-transfected into HeLa cells with a Qk-6 expression vector and the expressed mRNA from each vector was examined by qPCR. Relative mRNA levels to *eGFP* lacking a 3' UTR (*eGFP*) are shown. Data are presented as mean  $\pm$  SD (experiments were performed with biological triplicate ( $n = 3$ ), \*\*\* $p < 0.01$  using Student's *t* test).

(C) Pathway analysis of regulatory Qk target genes. The table lists the pathways for which the *p* value is  $< 0.001$  and FDR (false discovery rate) is  $< 0.1$ . Genes highlighted with yellow are categorized as cell-surface receptors or ligands.

et al., 2017; Galarneau and Richard, 2005; Hafner et al., 2010; Hayakawa-Yano et al., 2017). Previous studies have indicated that Qk binds directly to the QRE(s) in the 3' untranslated region (3' UTR) and stabilizes target mRNAs (Larocque et al., 2005; Li et al., 2000; Zearfoss et al., 2011; Zhang et al., 2003; Zhao et al., 2006). Based on these findings, we examined whether Qk globally regulates expression of genes possessing a QRE(s) in their 3' UTR. We analyzed the relationship between FC of all expressed genes under Qk-KO conditions and the presence of QREs in 3' UTRs. Compared with genes that lack QRE, the cumulative curves of genes possessing QREs were shifted to the left according to the number of QREs they possessed, indicating that the loss of Qk decreased expression of target mRNAs (Figure 6A).

We next examined whether QREs in the 3' UTR of transcripts are responsible for Qk-dependent mRNA expression. Endocytosis has been identified as a regulatory target of Qk (Shingu et al., 2017), and two endocytosis pathway genes, *Rab5a* and *Snx5* (*Sorting nexin 5*), were identified as targets of Qk containing QREs in their 3' UTR and were downregulated in Qk-KO NSCs ( $\log_2$  FC =  $-1.12$  for *Rab5a* and  $-1.49$  for *Snx5*). Two non-target control endocytosis

pathway genes *Cbl* and *Cav1* (*Caveolin 1*) do not possess QREs in their 3' UTR, yet were also downregulated in Qk-KO NSCs ( $\log_2$  FC =  $-0.63$  for *Cbl* and  $-1.44$  for *Cav1*). We generated reporter vectors that express *eGFP* (enhanced green fluorescent protein) mRNA with the 3' UTR of these genes (Figure 6B). Each reporter construct was co-transfected with the cytoplasmic isoform of Qk-6 (Qk full). To examine whether the presence of Qk is sufficient to stabilize target mRNAs in a non-cell-type-specific manner, HeLa cells were used due to their low, or undetectable, levels of endogenous Qk mRNA and protein compared with brain samples (data not shown). The levels of *eGFP* mRNA of *Rab5a* and *Snx5* reporters were significantly higher than Cont *eGFP* lacking a 3' UTR (1.80- and 1.88-fold for *Rab5a* and *Snx5* wt 3' UTRs, respectively; Figure 6B), while levels of *Cbl* and *Cav1* reporters lacking QREs were comparable to Cont *eGFP* (1.01- and 1.08-fold for *Cbl* and *Cav1* wt 3' UTRs, respectively; Figure 6B), suggesting that Qk stabilized *Rab5a* and *Snx5* reporter mRNAs via QREs. We further examined the ability of QREs to stabilize mRNAs by introducing a mutation in which the putative QRE was changed from ACTAAH to TCGAGH. The mRNA levels of QRE-mutated *Rab5a* and *Snx5* reporters (*Rab5a*

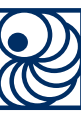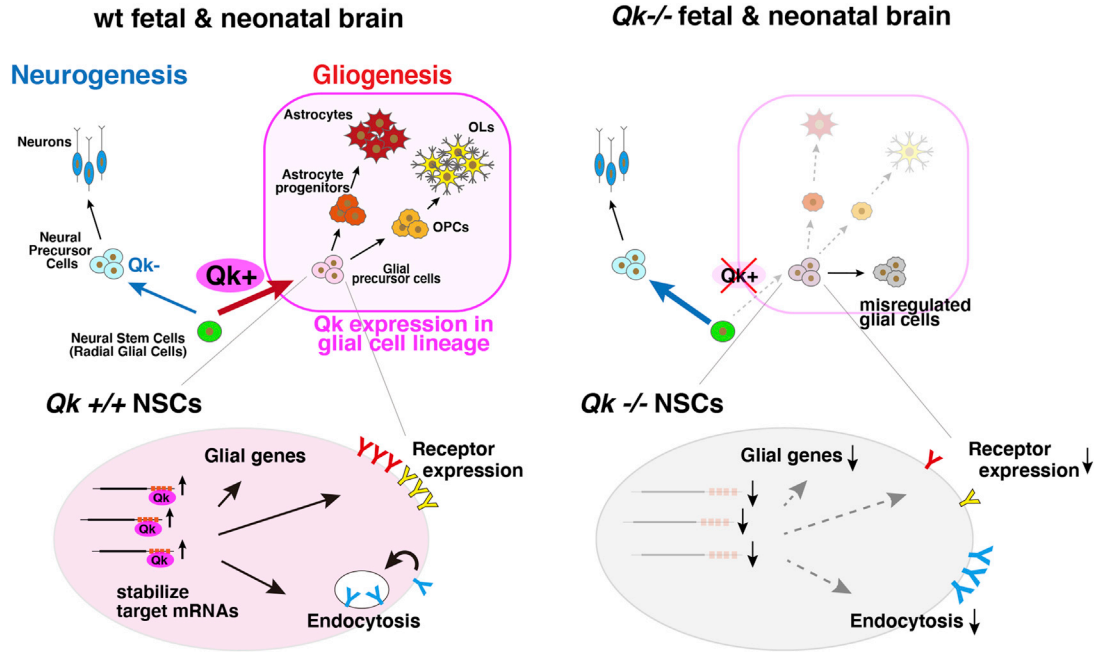

**Figure 7. Scheme for the Identified Qk Function in Regulation of Glial Differentiation from NSCs**

mut 3' UTR and *Snx5* mut 3' UTR) decreased to a level comparable to *Cont eGFP*, *Cbl*, and *Cav1* reporters lacking QRE, indicating that the mutation rendered them insensitive to Qk (1.18- and 1.26-fold for *Rab5a* and *Snx5* mut 3' UTR, respectively; Figure 6B). These results indicate that a QRE(s) in the 3' UTR is essential for Qk-dependent upregulation of target mRNAs.

To further identify the target genes of Qk that regulate gliogenesis, the significantly downregulated genes in the *Qk*-KO NSC-induced glial differentiation were separated according to the presence or absence of a QRE(s) in their 3' UTR. A total of 279 genes were identified as putative Qk targets. These were further classified according to astrocyte-, OL-, OPC-, glia-, or neuron-enriched genes using gene lists for GSEA. The putative Qk target genes contained numerous glia-, astrocyte-, OL-, and OPC-enriched genes. These include essential molecules for the proliferation or development of astrocytes or OLs, such as *S100β* (Zimmer et al., 1995) and *PDGF-Rα* (Funa and Sasahara, 2014) (Table S2), indicating that several gliogenic genes possess QREs and that Qk comprehensively upregulates them during gliogenesis. To further identify the Qk-targeted regulons of gliogenesis, we carried out a gene ontology pathway analysis of the 279 putative target genes of Qk. We identified two biological processes with significant enrichment scores ( $p < 1 \times 10^{-3}$  and  $q < 0.1$ ): “positive regulation of peptidyl-tyrosine phosphorylation” and “positive regulation of cell migration” (Figure 6C). Although there was no clear evidence that these processes are essential for gliogenesis,

genes in these categories are highly enriched for cell-surface signaling receptors or ligands (9/11 and 11/14, respectively) (Figure 6C) such as *PDGF-Rα* or *FGF receptor 3*, which was recently shown to be essential for the neurogenic-to-gliogenic fate transition of NSCs (Dinh Duong et al., 2019). These data indicate that Qk is necessary for the upregulation of several cell-surface signaling molecules that mediate glial differentiation. The gene set involved in the “endocytosis pathway” was identified in the Kyoto Encyclopedia of Genes and Genomes (KEGG) with a significant enrichment score ( $p < 1 \times 10^{-3}$  and  $q < 0.1$ ) (Figure 6C), and this pathway is essential for glial differentiation (please see Discussion). Taking our results together, we have indicated that Qk is required for comprehensive upregulation of (1) astrocyte/OL-specific genes, (2) cell-surface signaling receptors, and (3) endocytosis pathway genes as gliogenic regulons (Figure 7). As previously mentioned, Qk is known to regulate OL production, as observed in hypomorphic *qkv* mice. However, these studies, using NSC-specific null mutant mice for *Qk*, revealed the extended role of Qk in regulating gliogenesis.

## DISCUSSION

Growing evidence indicates the significance of RBPs in neuronal development and brain functions. NOVA1/2 (Ule et al., 2005), PTBP1 (polypyrimidine tract binding protein 1) (Boutz et al., 2007; Licatalosi et al., 2012; Zhang



et al., 2016), SRRM4 (serine/arginine repetitive matrix 4) (Calarco et al., 2009), RBFOX1/2 (RNA-binding protein fox-1 homolog 1/2) (Gehman et al., 2011, 2012), TDP-43 (TAR DNA binding protein-43) (Polymenidou et al., 2011), Fus (fused in sarcoma) (Lagier-Tourenne et al., 2012), and SFPQ/PSF (splicing factor proline/glutamine rich or PTB-associated splicing factor) (Takeuchi et al., 2018) have been shown to be essential for neurogenesis or neural functions. In contrast, PTBP2 (Boutz et al., 2007; Licatalosi et al., 2012; Zhang et al., 2016), ELAVL2 (ELAV-like RNA-binding protein 2) (Akamatsu et al., 1999), and musashi (Sakakibara et al., 2002) have been demonstrated to be required for the proliferation and stemness of NSCs. These studies show that specific subsets of RBPs are important in neurons and NSCs encompassing neurogenesis, yet RBPs with specific roles in gliogenesis were not identified. The systematic exploration of all RBPs herein revealed Qk function in astrocytes as well as in the fate decision of NSCs to glial cells (Figure 7), while Qk is widely accepted as the specific regulator for OL differentiation.

Genetic studies have identified mutations in RBP genes as causes of neurodegenerative or psychiatric diseases, indicating that RBPs play important roles in brain function (Kapeli and Yeo, 2012). Alterations in isoform expression of the human homolog of *Qk*, *QKI*, were demonstrated in approximately 30% (6/20) of glioblastomas (Li et al., 2002), and *QKI* was identified through a genotype-phenotype study as a tumor suppressor that affects the stemness of glioma stem cells (Hu et al., 2013; Shingu et al., 2017). Here, we reveal that the loss of *Qk* selectively disturbed the glial differentiation of NSCs. These findings provide insight into why *Qk* mutations contribute to poorly differentiated malignant glial cell tumors, as well as into the molecular pathogenesis of glioblastomas and their treatment. Interestingly, *QKI* mutation or dysregulation of *QKI* expression is frequently observed in schizophrenia patients, and decreased transcript levels of *QKI-7* and *QKI-7b* splice variants (or their aberrant splicing) were reported (please see review by Chenard and Richard, 2008). These results suggest an association between the dysregulation of gliogenesis and the pathological mechanism of schizophrenia. In addition, a number of studies have investigated the nature of unique postnatal stem cells of NG2 cells, which give rise to both glial cells and interneurons (Tsoa et al., 2014). We observed *Qk* expression in NG2 cells and their ablation in P0 *Qk*-KO cortices (Figure S2D), suggesting an essential function of *Qk* in gliogenesis and also in neurogenesis. We also found that *QK* is expressed in microglial cells; of note, its expression is not inactivated in *Nestin-Cre* mice (Figure S3C, *Qk*-KO), since microglial cells are not generated from NSCs in brain but

originate from non-neuronal fetal tissues. As our *Qk*-KO mice experienced premature death, similar to that observed in *qk<sup>es</sup>* mice (Noveroske et al., 2005), and microglial cells still expressed *Qk* in this context, further studies using time- and site-specific gene-targeting techniques would be expected to decipher the function of *Qk* in adult brains and to elucidate its roles in NG2 cells, microglial cells, and the disease-causing mechanisms in adult brains.

The mechanism responsible for directly inducing glial cells from NSCs requires further investigation. *Qk* regulates the differentiation of NSCs to GPCs by comprehensively regulating gliogenic regulons that include glia-, astrocyte-, OPC-, and OL-specific genes, cell-surface signaling receptors, and endocytosis pathway genes (Figure 7). Endocytosis pathways facilitate signaling receptor expression and replacement (Haglund and Dikic, 2012). Downregulation of *Qk* causes persistent expression of the receptors responsible for maintaining pluripotency and prevents differentiation of NSCs in *Qk/Pten/Trp53* triple-KO mouse brains (Shingu et al., 2017). Mechanistically, *Qk* stabilizes the target mRNAs of the genes listed above. Thus, transcriptional regulation and *Qk* may synergistically regulate gliogenic gene expression. In addition, we noted that *Qk<sup>-/-</sup>* NSCs failed to differentiate into GPCs and aberrantly expressed neural genes; however, these *Qk<sup>-/-</sup>* NSCs were unable to become mature neurons (data not shown), which is consistent with the observation that cortical formation was intact at E18.5. This result indicates that the mechanism of fate switching between neurogenesis and gliogenesis could not be explained simply by the presence or absence of *Qk* in precursor cells. The identification of *Qk* as the RBP that drives GPC development allows *Qk* to be used as a marker for the isolation of GPCs and is an ideal tool for the characterization of GPCs and further investigations into the regulatory mechanisms of gliogenesis. This would lead to an enriched understanding of the global structure of the regulation of glial differentiation from NSCs during brain development, as well as the disease-causing mechanism and pathological consequence of schizophrenia.

## EXPERIMENTAL PROCEDURES

### Mice

Conditional KO mice for *Qk* were generated (Figures S1A and S1B). Detailed information is given in the Supplemental Experimental Procedures. All animal care and experiments were conducted in accordance with the US National Institutes of Health *Guide for the Care and Use of Laboratory Animals*, and all experimental protocols were approved by the Institutional Animal Care and Use Committee of the Kyoto University Graduate School of Medicine and the RIKEN Kobe Branch.



## Primary Neural Stem/Precursor Cell (NS/PC) Culture and Differentiation into Astrocytes

NS/PCs were isolated from E14 mouse embryo (male and female) cortices of *Qk*-KO and Cont brains. To induce glial differentiation, cells were seeded on dishes in N2 medium lacking bFGF but containing 10% fetal bovine serum.

## Exon Array Analysis of NSC- and Neuron-Specific Layers and Bioinformatics Analysis

Cranial regions were isolated from E15.5 C57BL/6 mouse embryos. The lower and upper areas of the entire cortex (harboring NSC- and neuron-specific regions, respectively) from rostral to caudal were isolated using a laser capture microdissection system (LMD6; Leica) (Figure 1A). Exon array experiments were performed using the GeneChip Mouse Exon 1.0 ST Exon Array (Affymetrix, Santa Clara, CA, USA) as previously described (Ishigaki et al., 2012). Bioinformatics analysis of exon array data was performed as previously described (Yamashita et al., 2012).

## Comparative Analysis of RNA-Seq Data from NSCs

RNA-seq was performed as previously described (Takeuchi et al., 2018). For differential gene expression analysis, we used DEseq2 (Love et al., 2014). Genes that met the following criteria were considered as differentially expressed:  $\log_2$  FC > 0.58 (FC > 1.5) or  $\log_2$  FC < -0.58 (FC < 0.67) and an adjusted  $p < 0.01$  for primary cells; raw tag count  $\geq 31$  for at least one condition (Cont or *Qk*-KO); and TPM  $\geq 2$  for at least one condition. Raw data from mRNA-seq were deposited in the Gene Expression Omnibus (GEO) under accession no. GSE117018.

## Data and Code Availability

All data are available from the GEO under accession no. GSE117018. In-house scripts were used to calculate RPKM and TPM. All data and scripts not included here are available from the corresponding author upon reasonable request.

## SUPPLEMENTAL INFORMATION

Supplemental Information can be found online at <https://doi.org/10.1016/j.stemcr.2020.08.010>.

## AUTHOR CONTRIBUTIONS

A.T. conceived and designed the study, generated *Qk*-KO mice, performed the experiments, and wrote the manuscript. Y.T. contributed to the initial phenotypic analysis. K. Iida performed bioinformatic analysis of high-throughput sequencing data. M. Hosokawa assisted with wet experiments. K. Irie and K.N. provided technical supervision and assisted with *in vitro* experiments using NSCs. M.I. and K.O. performed the exon array experiment. J.B.B. assisted in writing the manuscript. M. Hagiwara assisted in project and manuscript preparation.

## ACKNOWLEDGMENTS

We thank the Kyoto University Medical Research Support Center for performing the high-throughput sequencing analysis and its Institute of Laboratory Animals for providing animal care; A. Hagi-

wara, A. Hirose, and K. Makigaya for technical assistance; Dr. T. Awaya for critical reading of the manuscript and helpful comments; and Editage ([www.editage.jp](http://www.editage.jp)) for English language editing of this article. This work was supported in part by the Japan Society for the Promotion of Science (JSPS) Grants-in-Aid for Scientific Research (KAKENHI) from the Ministry of Education, Culture, Sports, Science and Technology of Japan (MEXT, JSPS KAKENHI 19500269, 25500288, 21249013, 15H05721, 19K06907) (to M. Hagiwara and A.T.); Innovative Cell Biology by Innovating Technology (Cell Innovation) (to M. Hagiwara, K.O., and A.T.); a Core Research for Evolutional Science and Technology grant from the Japan Science and Technology Agency (to M. Hagiwara); a grant from the Japan Agency for Medical Research and Development (to M. Hagiwara); the Asian CORE Program of JSPS (to M. Hagiwara); iCeMS Cross-Disciplinary Research Promotion Project of Kyoto University (to A.T.); and the Fujiwara Memorial Foundation (to A.T.).

Received: February 8, 2020

Revised: August 24, 2020

Accepted: August 24, 2020

Published: September 24, 2020

## REFERENCES

- Akamatsu, W., Okano, H.J., Osumi, N., Inoue, T., Nakamura, S., Sakakibara, S., Miura, M., Matsuo, N., Darnell, R.B., and Okano, H. (1999). Mammalian ELAV-like neuronal RNA-binding proteins HuB and HuC promote neuronal development in both the central and the peripheral nervous systems. *Proc. Natl. Acad. Sci. U S A* *96*, 9885–9890.
- Boutz, P.L., Stoilov, P., Li, Q., Lin, C.H., Chawla, G., Ostrow, K., Shiue, L., Ares, M., Jr., and Black, D.L. (2007). A post-transcriptional regulatory switch in polypyrimidine tract-binding proteins reprograms alternative splicing in developing neurons. *Genes Dev.* *21*, 1636–1652.
- Bronstein, R., Kyle, J., Abraham, A.B., and Tsirka, S.E. (2017). Neurogenic to gliogenic fate transition perturbed by loss of HMGB2. *Front. Mol. Neurosci.* *10*, 153.
- Cahoy, J.D., Emery, B., Kaushal, A., Foo, L.C., Zamanian, J.L., Christopherson, K.S., Xing, Y., Lubischer, J.L., Krieg, P.A., Kruppenko, S.A., et al. (2008). A transcriptome database for astrocytes, neurons, and oligodendrocytes: a new resource for understanding brain development and function. *J. Neurosci.* *28*, 264–278.
- Calarco, J.A., Superina, S., O'Hanlon, D., Gabut, M., Raj, B., Pan, Q., Skalska, U., Clarke, L., Gelinias, D., van der Kooy, D., et al. (2009). Regulation of vertebrate nervous system alternative splicing and development by an SR-related protein. *Cell* *138*, 898–910.
- Chenard, C.A., and Richard, S. (2008). New implications for the QUAKING RNA binding protein in human disease. *J. Neurosci. Res.* *86*, 233–242.
- Corley, M., and Kroll, K.L. (2015). The roles and regulation of Polycomb complexes in neural development. *Cell Tissue Res* *359*, 65–85.



- Dinh Duong, T.A., Hoshiba, Y., Saito, K., Kawasaki, K., Ichikawa, Y., Matsumoto, N., Shinmyo, Y., and Kawasaki, H. (2019). FGF signaling directs the cell fate switch from neurons to astrocytes in the developing mouse cerebral cortex. *J. Neurosci.* *39*, 6081–6094.
- Fagg, W.S., Liu, N., Fair, J.H., Shiue, L., Katzman, S., Donohue, J.P., and Ares, M., Jr. (2017). Autogenous cross-regulation of Quaking mRNA processing and translation balances Quaking functions in splicing and translation. *Genes Dev.* *31*, 1894–1909.
- Funa, K., and Sasahara, M. (2014). The roles of PDGF in development and during neurogenesis in the normal and diseased nervous system. *J. Neuroimmune Pharmacol.* *9*, 168–181.
- Galarneau, A., and Richard, S. (2005). Target RNA motif and target mRNAs of the Quaking STAR protein. *Nat. Struct. Mol. Biol.* *12*, 691–698.
- Gehman, L.T., Meera, P., Stoilov, P., Shiue, L., O'Brien, J.E., Meisler, M.H., Ares, M., Jr., Otis, T.S., and Black, D.L. (2012). The splicing regulator Rbfox2 is required for both cerebellar development and mature motor function. *Genes Dev.* *26*, 445–460.
- Gehman, L.T., Stoilov, P., Maguire, J., Damianov, A., Lin, C.H., Shiue, L., Ares, M., Jr., Mody, I., and Black, D.L. (2011). The splicing regulator Rbfox1 (A2BP1) controls neuronal excitation in the mammalian brain. *Nat. Genet.* *43*, 706–711.
- Gerstberger, S., Hafner, M., and Tuschl, T. (2014). A census of human RNA-binding proteins. *Nat. Rev. Genet.* *15*, 829–845.
- Groteklaes, A., Bonisch, C., Eiberger, B., Christ, A., and Schilling, K. (2020). Developmental maturation of the cerebellar white matter—an instructive environment for cerebellar inhibitory interneurons. *Cerebellum* *19*, 286–308.
- Hafner, M., Landthaler, M., Burger, L., Khorshid, M., Hausser, J., Berninger, P., Rothballer, A., Ascano, M., Jr., Jungkamp, A.C., Munschauer, M., et al. (2010). Transcriptome-wide identification of RNA-binding protein and microRNA target sites by PAR-CLIP. *Cell* *141*, 129–141.
- Haglund, K., and Dikic, I. (2012). The role of ubiquitylation in receptor endocytosis and endosomal sorting. *J. Cell Sci.* *125*, 265–275.
- Hardy, R.J. (1998). Molecular defects in the dysmyelinating mutant quaking. *J. Neurosci. Res.* *51*, 417–422.
- Hayakawa-Yano, Y., Suyama, S., Nogami, M., Yugami, M., Koya, I., Furukawa, T., Zhou, L., Abe, M., Sakimura, K., Takebayashi, H., et al. (2017). An RNA-binding protein, Qki5, regulates embryonic neural stem cells through pre-mRNA processing in cell adhesion signaling. *Genes Dev.* *31*, 1910–1925.
- Hirabayashi, Y., Suzuki, N., Tsuboi, M., Endo, T.A., Toyoda, T., Shinga, J., Koseki, H., Vidal, M., and Gotoh, Y. (2009). Polycomb limits the neurogenic competence of neural precursor cells to promote astrogenic fate transition. *Neuron* *63*, 600–613.
- Hu, J., Ho, A.L., Yuan, L., Hu, B., Hua, S., Hwang, S.S., Zhang, J., Hu, T., Zheng, H., Gan, B., et al. (2013). From the Cover: neutralization of terminal differentiation in gliomagenesis. *Proc. Natl. Acad. Sci. U S A* *110*, 14520–14527.
- Imayoshi, I., and Kageyama, R. (2014). bHLH factors in self-renewal, multipotency, and fate choice of neural progenitor cells. *Neuron* *82*, 9–23.
- Ishigaki, S., Masuda, A., Fujioka, Y., Iguchi, Y., Katsuno, M., Shibata, A., Urano, F., Sobue, G., and Ohno, K. (2012). Position-dependent FUS-RNA interactions regulate alternative splicing events and transcriptions. *Sci. Rep.* *2*, 529.
- Kapeli, K., and Yeo, G.W. (2012). Genome-wide approaches to dissect the roles of RNA binding proteins in translational control: implications for neurological diseases. *Front. Neurosci.* *6*, 144.
- Keene, J.D. (2007). RNA regulons: coordination of post-transcriptional events. *Nat. Rev. Genet.* *8*, 533–543.
- Lagier-Tourenne, C., Polymenidou, M., Hutt, K.R., Vu, A.Q., Baughn, M., Huelga, S.C., Clutario, K.M., Ling, S.C., Liang, T.Y., Mazur, C., et al. (2012). Divergent roles of ALS-linked proteins FUS/TLS and TDP-43 intersect in processing long pre-mRNAs. *Nat. Neurosci.* *15*, 1488–1497.
- Larocque, D., Galarnau, A., Liu, H.N., Scott, M., Almazan, G., and Richard, S. (2005). Protection of p27(Kip1) mRNA by quaking RNA binding proteins promotes oligodendrocyte differentiation. *Nat. Neurosci.* *8*, 27–33.
- Lennox, A.L., Mao, H., and Silver, D.L. (2018). RNA on the brain: emerging layers of post-transcriptional regulation in cerebral cortex development. *Wiley Interdiscip. Rev. Dev. Biol.* *7*. <https://doi.org/10.1002/wdev.290>.
- Li, Z., Takakura, N., Oike, Y., Imanaka, T., Araki, K., Suda, T., Kaname, T., Kondo, T., Abe, K., and Yamamura, K. (2003). Defective smooth muscle development in qki-deficient mice. *Dev. Growth Differ.* *45*, 449–462.
- Li, Z., Zhang, Y., Li, D., and Feng, Y. (2000). Destabilization and mislocalization of myelin basic protein mRNAs in quaking dysmyelination lacking the QKI RNA-binding proteins. *J. Neurosci.* *20*, 4944–4953.
- Li, Z.Z., Kondo, T., Murata, T., Ebersole, T.A., Nishi, T., Tada, K., Ushio, Y., Yamamura, K., and Abe, K. (2002). Expression of Hqk encoding a KH RNA binding protein is altered in human glioma. *Jpn. J. Cancer Res.* *93*, 167–177.
- Licatalosi, D.D., Yano, M., Fak, J.J., Mele, A., Grabinski, S.E., Zhang, C., and Darnell, R.B. (2012). Ptpb2 represses adult-specific splicing to regulate the generation of neuronal precursors in the embryonic brain. *Genes Dev.* *26*, 1626–1642.
- Loo, L., Simon, J.M., Xing, L., McCoy, E.S., Niehaus, J.K., Guo, J., Anton, E.S., and Zylka, M.J. (2019). Single-cell transcriptomic analysis of mouse neocortical development. *Nat. Commun.* *10*, 134.
- Love, M.I., Huber, W., and Anders, S. (2014). Moderated estimation of fold change and dispersion for RNA-seq data with DESeq2. *Genome Biol.* *15*, 550.
- Marshall, C.A., Novitsch, B.G., and Goldman, J.E. (2005). Olig2 directs astrocyte and oligodendrocyte formation in postnatal subventricular zone cells. *J. Neurosci.* *25*, 7289–7298.
- Meijer, D.H., Kane, M.F., Mehta, S., Liu, H., Harrington, E., Taylor, C.M., Stiles, C.D., and Rowitch, D.H. (2012). Separated at birth? The functional and molecular divergence of OLIG1 and OLIG2. *Nat. Rev. Neurosci.* *13*, 819–831.
- Mosser, C.A., Baptista, S., Arnoux, I., and Audinat, E. (2017). Microglia in CNS development: shaping the brain for the future. *Prog. Neurobiol.* *149-150*, 1–20.



- Nishiyama, A., Komitova, M., Suzuki, R., and Zhu, X. (2009). Polydendrocytes (NG2 cells): multifunctional cells with lineage plasticity. *Nat. Rev. Neurosci.* *10*, 9–22.
- Noveroske, J.K., Hardy, R., Dapper, J.D., Vogel, H., and Justice, M.J. (2005). A new ENU-induced allele of mouse quaking causes severe CNS dysmyelination. *Mamm. Genome* *16*, 672–682.
- Oberdoerffer, P., Otipoby, K.L., Maruyama, M., and Rajewsky, K. (2003). Unidirectional Cre-mediated genetic inversion in mice using the mutant loxP pair lox66/lox71. *Nucleic Acids Res.* *31*, e140.
- Ozturk, N., Singh, I., Mehta, A., Braun, T., and Barreto, G. (2014). HMGA proteins as modulators of chromatin structure during transcriptional activation. *Front. Cell Dev. Biol.* *2*, 5.
- Polymenidou, M., Lagier-Tourenne, C., Hutt, K.R., Huelga, S.C., Moran, J., Liang, T.Y., Ling, S.C., Sun, E., Wancewicz, E., Mazur, C., et al. (2011). Long pre-mRNA depletion and RNA missplicing contribute to neuronal vulnerability from loss of TDP-43. *Nat. Neurosci.* *14*, 459–468.
- Rowitch, D.H., and Kriegstein, A.R. (2010). Developmental genetics of vertebrate glial-cell specification. *Nature* *468*, 214–222.
- Sakakibara, S., Nakamura, Y., Yoshida, T., Shibata, S., Koike, M., Takano, H., Ueda, S., Uchiyama, Y., Noda, T., and Okano, H. (2002). RNA-binding protein Musashi family: roles for CNS stem cells and a subpopulation of ependymal cells revealed by targeted disruption and antisense ablation. *Proc. Natl. Acad. Sci. U S A* *99*, 15194–15199.
- Schnutgen, F., De-Zolt, S., Van Sloun, P., Hollatz, M., Floss, T., Hansen, J., Altschmied, J., Seisenberger, C., Ghyselinck, N.B., Ruiz, P., et al. (2005). Genomewide production of multipurpose alleles for the functional analysis of the mouse genome. *Proc. Natl. Acad. Sci. U S A* *102*, 7221–7226.
- Shingu, T., Ho, A.L., Yuan, L., Zhou, X., Dai, C., Zheng, S., Wang, Q., Zhong, Y., Chang, Q., Horner, J.W., et al. (2017). Qki deficiency maintains stemness of glioma stem cells in suboptimal environment by downregulating endolysosomal degradation. *Nat. Genet.* *49*, 75–86.
- Stolt, C.C., Rehberg, S., Ader, M., Lommes, P., Riethmacher, D., Schachner, M., Bartsch, U., and Wegner, M. (2002). Terminal differentiation of myelin-forming oligodendrocytes depends on the transcription factor Sox10. *Genes Dev.* *16*, 165–170.
- Takeuchi, A., Iida, K., Tsubota, T., Hosokawa, M., Denawa, M., Brown, J.B., Ninomiya, K., Ito, M., Kimura, H., Abe, T., et al. (2018). Loss of *sfpq* causes long-gene transcriptopathy in the brain. *Cell Rep* *23*, 1326–1341.
- Tsoa, R.W., Coskun, V., Ho, C.K., de Vellis, J., and Sun, Y.E. (2014). Spatiotemporally different origins of NG2 progenitors produce cortical interneurons versus glia in the mammalian forebrain. *Proc. Natl. Acad. Sci. U S A* *111*, 7444–7449.
- Ule, J., Ule, A., Spencer, J., Williams, A., Hu, J.S., Cline, M., Wang, H., Clark, T., Fraser, C., Ruggiu, M., et al. (2005). Nova regulates brain-specific splicing to shape the synapse. *Nat. Genet.* *37*, 844–852.
- Yamashita, Y., Matsuura, T., Shinmi, J., Amakusa, Y., Masuda, A., Ito, M., Kinoshita, M., Furuya, H., Abe, K., Ibi, T., et al. (2012). Four parameters increase the sensitivity and specificity of the exon array analysis and disclose 25 novel aberrantly spliced exons in myotonic dystrophy. *J. Hum. Genet.* *57*, 368–374.
- Zearfoss, N.R., Clingman, C.C., Farley, B.M., McCoig, L.M., and Ryder, S.P. (2011). Quaking regulates *Hnrmpa1* expression through its 3' UTR in oligodendrocyte precursor cells. *PLoS Genet.* *7*, e1001269.
- Zhang, X., Chen, M.H., Wu, X., Kodani, A., Fan, J., Doan, R., Ozawa, M., Ma, J., Yoshida, N., Reiter, J.F., et al. (2016). Cell-type-specific alternative splicing governs cell fate in the developing cerebral cortex. *Cell* *166*, 1147–1162.e15.
- Zhang, Y., Chen, K., Sloan, S.A., Bennett, M.L., Scholze, A.R., O'Keefe, S., Phatnani, H.P., Guarnieri, P., Caneda, C., Ruderisch, N., et al. (2014). An RNA-sequencing transcriptome and splicing database of glia, neurons, and vascular cells of the cerebral cortex. *J. Neurosci.* *34*, 11929–11947.
- Zhang, Y., Lu, Z., Ku, L., Chen, Y., Wang, H., and Feng, Y. (2003). Tyrosine phosphorylation of QKI mediates developmental signals to regulate mRNA metabolism. *EMBO J.* *22*, 1801–1810.
- Zhao, L., Ku, L., Chen, Y., Xia, M., LoPresti, P., and Feng, Y. (2006). QKI binds MAP1B mRNA and enhances MAP1B expression during oligodendrocyte development. *Mol. Biol. Cell* *17*, 4179–4186.
- Zimmer, D.B., Cornwall, E.H., Landar, A., and Song, W. (1995). The S100 protein family: history, function, and expression. *Brain Res. Bull.* *37*, 417–429.

**Stem Cell Reports, Volume 15**

**Supplemental Information**

**Identification of Qk as a Glial Precursor Cell Marker that Governs the  
Fate Specification of Neural Stem Cells to a Glial Cell Lineage**

**Akihide Takeuchi, Yuji Takahashi, Kei Iida, Motoyasu Hosokawa, Koichiro Irie, Mikako Ito, J.B. Brown, Kinji Ohno, Kinichi Nakashima, and Masatoshi Hagiwara**



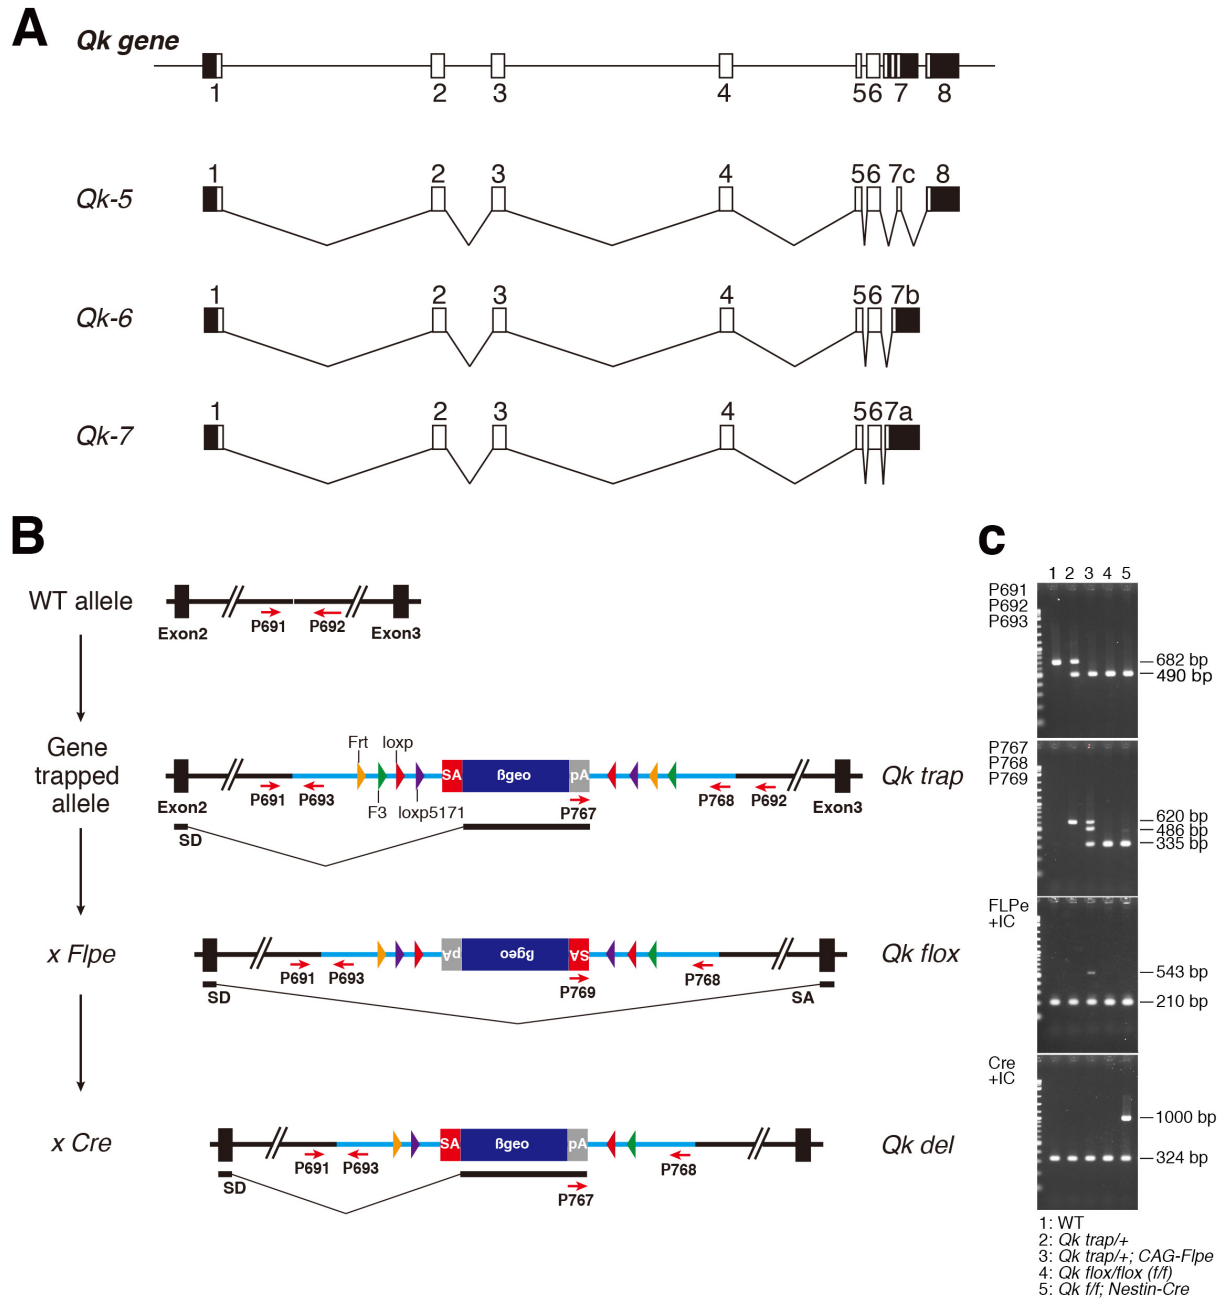

**Figure S1. Scheme for the conditional targeting of *Qk* in mice; relating to Figures 2, 3, and 4**

(A) A scheme showing the structure of *Qk* and its major alternative splice variants.

(B) Scheme for generating *Qk* conditional KO mice. A diagram of the targeted allele is

shown. *rsFlipROSA $\beta$ geo\** was inserted into intron 2 of the *Qk* gene. Red arrows indicate the positions of primers for genotyping PCR. The “ $\times$  *FLPe*” and “ $\times$  *Cre*” diagrams show the inversion induced by Flippase and Cre recombinase by crossing with *FLPe* and *Cre* mice, respectively. The *Qk* gene is trapped and replaced by  *$\beta$ geo* after exon2 by Cre-mediated inversion.

**(C)** Genotype PCR for distinguishing between wild-type allele (WT), gene trapped allele (*Qk trap*), floxed alleles (*Qk flox*) after FRT inversion; and KO alleles (*Qk del*) after Cre inversion. Primer pairs used for each genotyping PCR are indicated in **(B)** (refer to Transparent Methods subsection Mice). *FLPe* and *Cre* transgenes were detected using an internal control (IC).

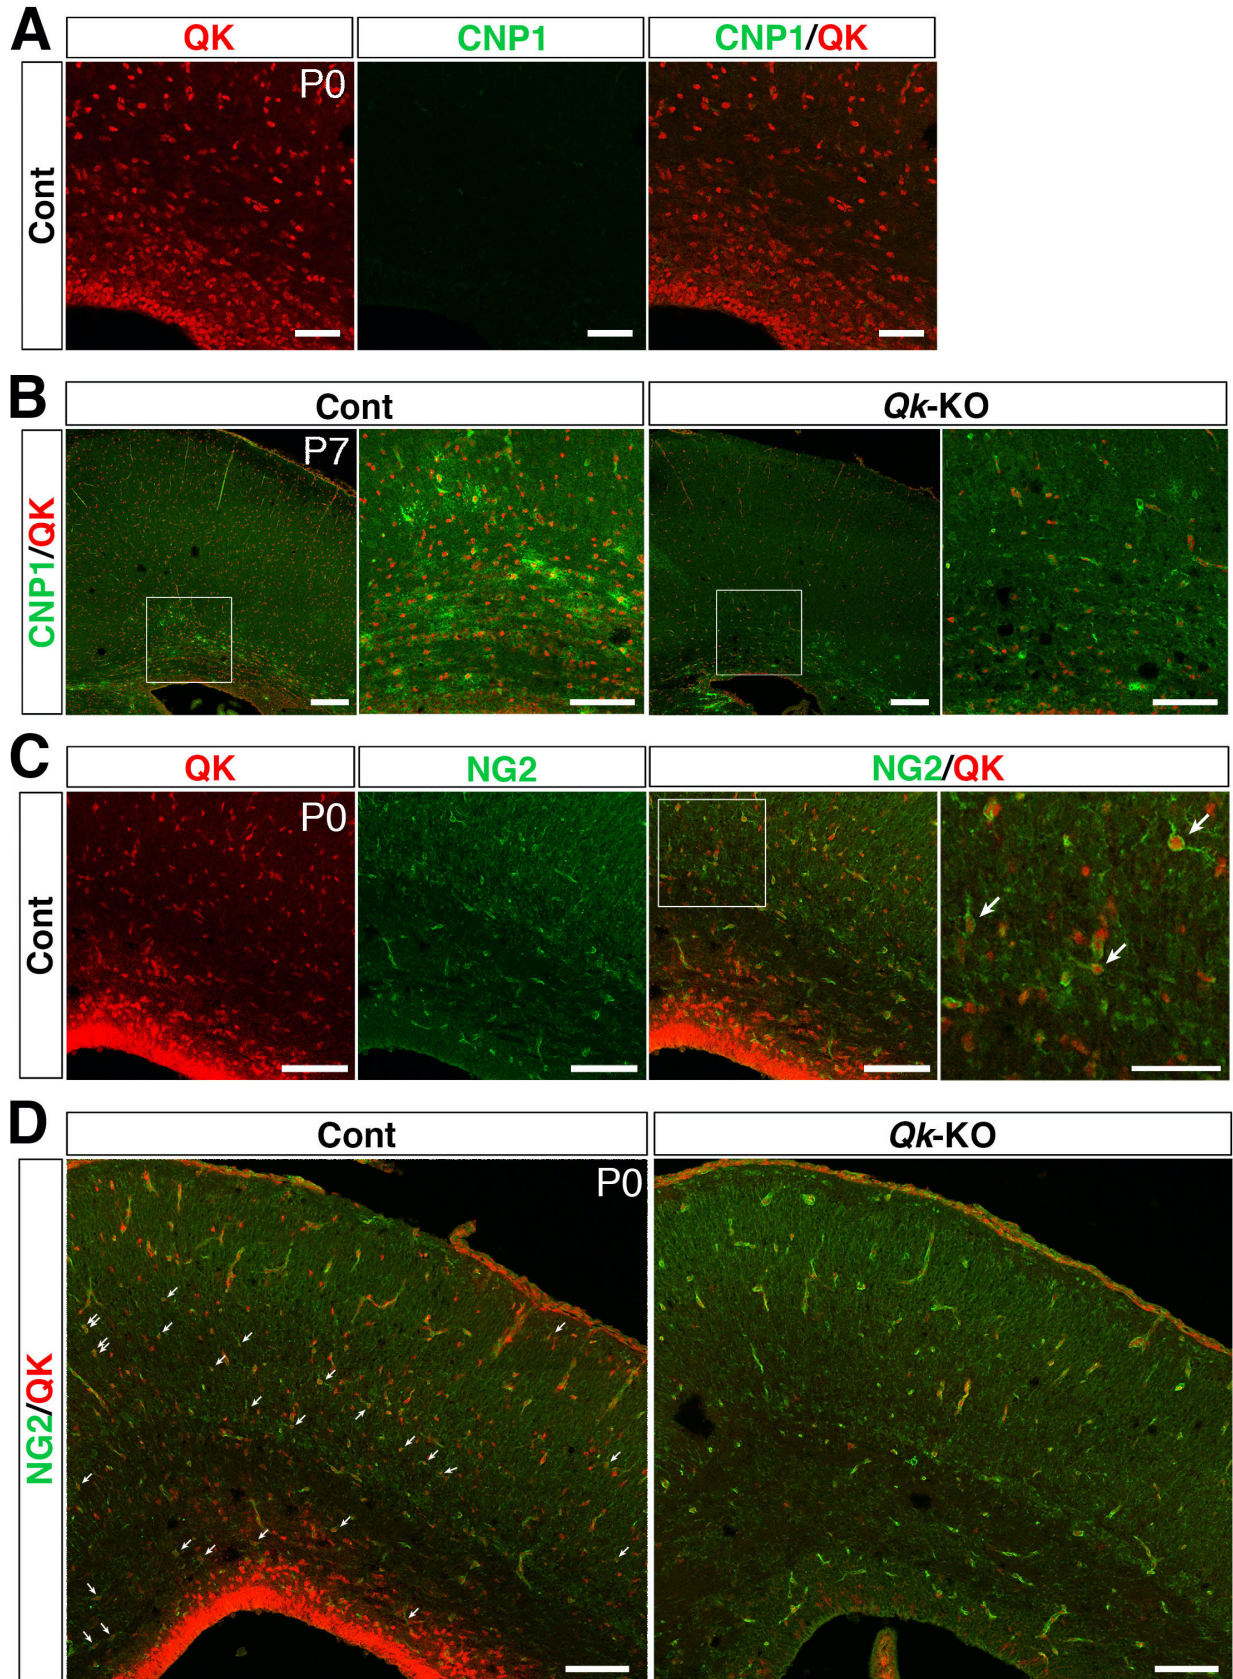

**Figure S2. NG2<sup>+</sup> cells express QK and loss of *Qk* abolishes NG2 cells; relating to**

**Figures 2, 3, and 4**

(A) Co-Immunostaining of QK (red) and CNP1 (green) in the coronal sections of P0 control (Cont) cortex. Scale bar = 50  $\mu\text{m}$ . (B) Co-Immunostaining of QK (red) and CNP1 (green) in the coronal sections of P7 Cont and *Qk*-KO cortices. The boxed areas in the 1st (Cont) and the 3rd (*Qk*-KO) panels from the left are shown at higher magnification in the 2nd and the 4th panels, respectively. Scale bar = 100  $\mu\text{m}$  (the 1st and the 3rd panels) and 50  $\mu\text{m}$  (the 2nd and the 4th panels). (C) Co-Immunostaining of QK (red) and NG2 (green) in the coronal sections of P0 Cont cortex (left three panels). The boxed area in the NG2/QK panel is shown at higher magnification in the right-most panel. Arrows indicate NG2-positive polydendrocytes (non-vascular cells), designated as NG2 cells showing highly branched morphology distinguished as the oligodendrocyte lineage cells. Scale bar = 100  $\mu\text{m}$  in left three panels and 50  $\mu\text{m}$  in the right-most panel. (D) Co-Immunostaining of QK (red) and NG2 (green) in the coronal sections of P0 Cont and *Qk*-KO cortices. Arrows indicate NG2-positive polydendrocytes cells, not be detected in *Qk*-KO cortex. Scale bar = 100  $\mu\text{m}$ .

## A Cell type-specific expression pattern of *Qk* in P0 Cerebral Cortex

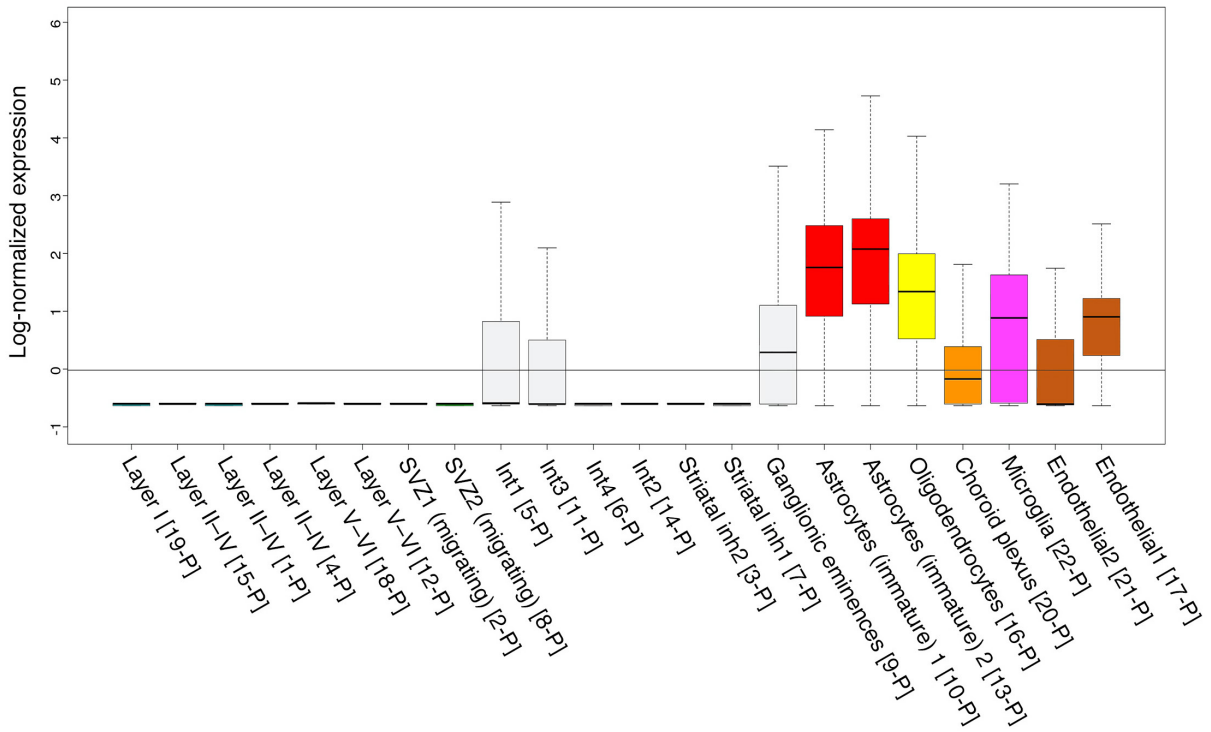

## B Proportion of *Qk*+ cells in P0 Cerebral Cortex

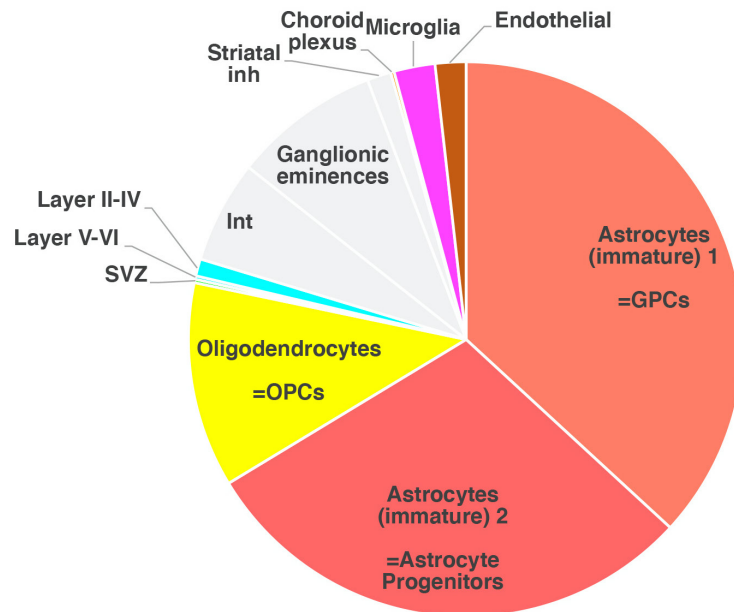

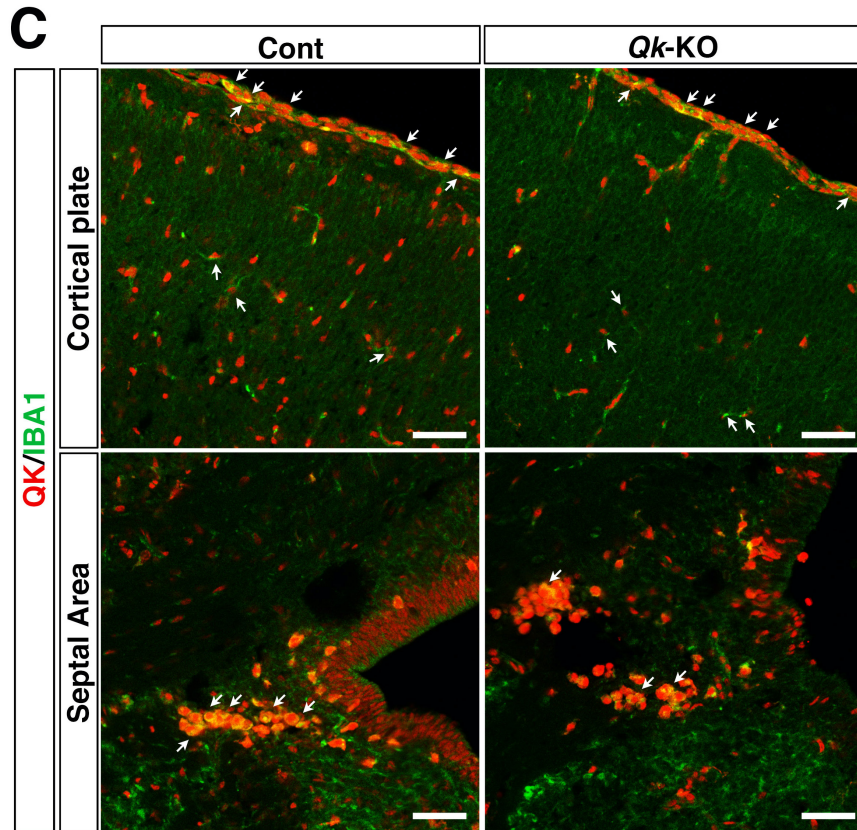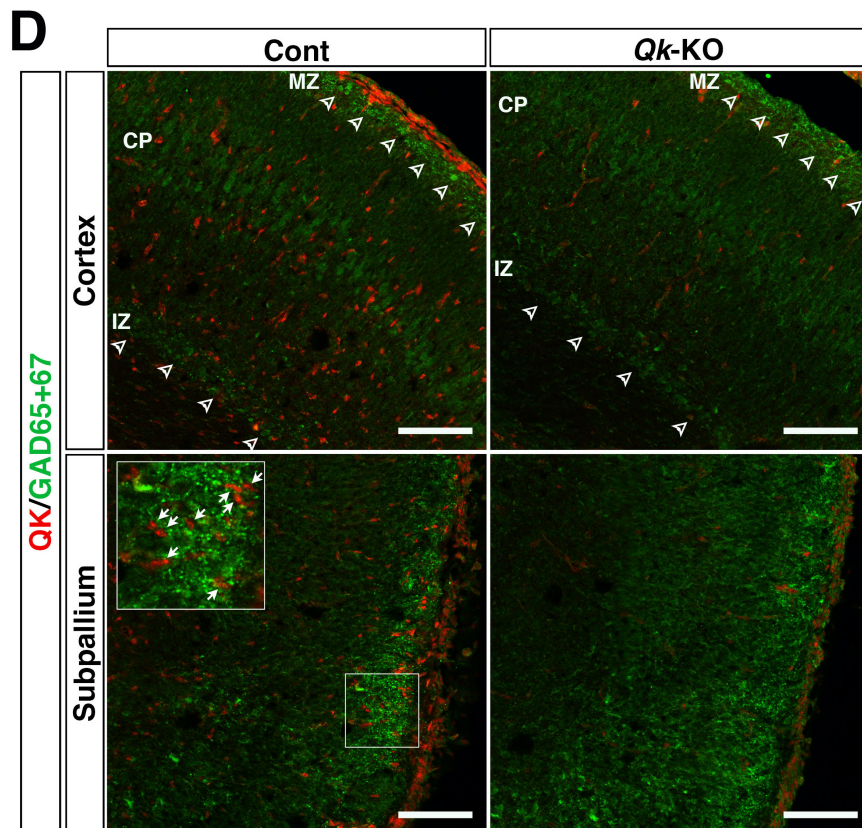

**E**

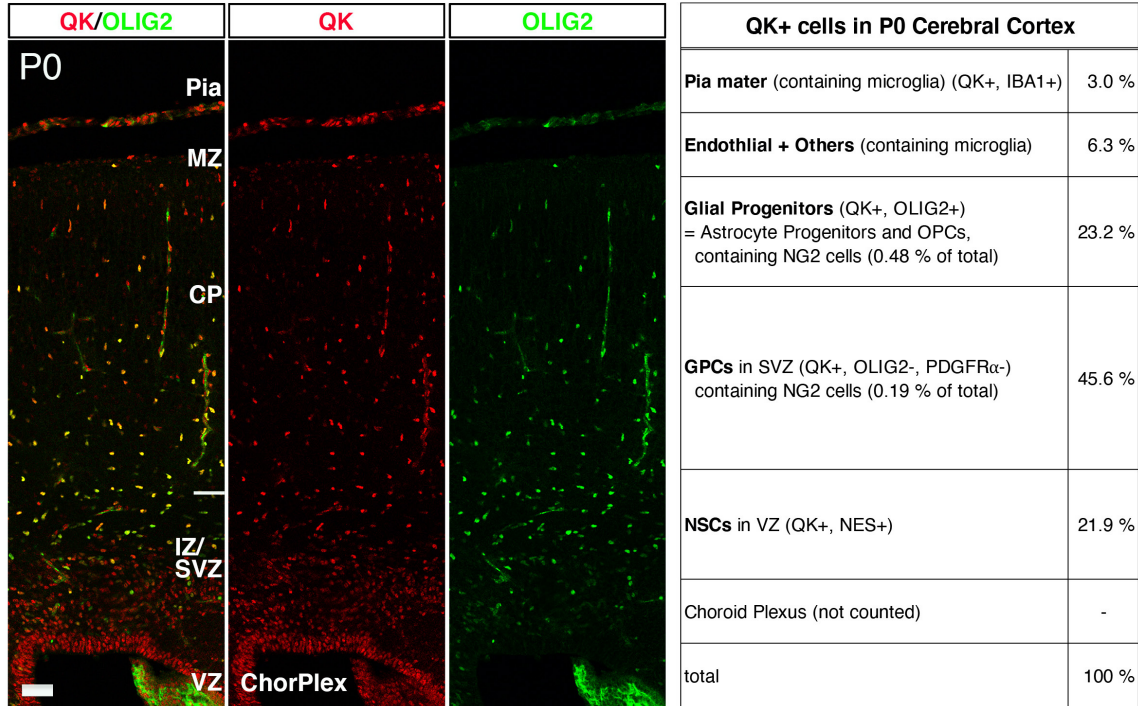

**Figure S3. Qk is expressed in microglial cells in the pia mater and interneurons in the subpallium, in P0 brains; relating to Figures 1, 2, 3, and 4**

(A) Identification of *Qk*-expressing cells in P0 cortices using single-cell transcriptomic analysis data of developing mouse neocortices (<http://zylkalab.org/data>). The cell population classified as Astrocytes (immature) 1, expressing both radial glial cell and astrocyte markers but lacking *Olig2* expression, can be considered as GPCs. Astrocytes (immature) 2, expressing the marker of Astrocyte-restricted precursor cells and also *Olig2*, can be considered as astrocytes progenitors. Non-neocortical cells in the

ganglionic eminences, the striatal inhibitory neurons, and the thalamus are included from adjacent non-cortical tissues.

**(B)** Proportion of *Qk*-expressing cells ( $Z$ -score  $\geq 2$ ) in E14 and P0 cortices. Non-cortical cells are also included from non-cortical tissues; shown with bright gray color.

**(C)** Co-Immunostaining of QK (red) and IBA1 (green) in the coronal sections of P0 control (Cont) and *Qk*-KO cortices. Arrows indicate double-positive cells. QK is expressed in IBA1-positive microglial cells in the pia mater and in the septal area. A smaller number of ramified shaped microglial cells, which were weakly positive for IBA1 (compared with the pia mater staining) and positive for QK, was observed in the cortical plate (arrows in the Cortical Plate). Scale bar = 50  $\mu\text{m}$ .

**(D)** Co-Immunostaining of QK (red) and GAD65/GAD67 (green) in the coronal sections of P0 Cont and *Qk*-KO cortices. Weak QK expression was detected in the subpallium where GAD65/GAD67-positive cells were accumulating (arrows), indicating QK expression in newly generated interneurons. However, tangentially migrating interneurons in the cerebral cortex were no longer positive for GAD65/GAD67 (open arrowhead), suggesting that QK expression in interneurons may be lost during differentiation, as we observed in cortical neurons (**Figure 1C**). Scale bar = 100  $\mu\text{m}$ .

Abbreviations are the same as in Figure 1A.



(E) Representative image of QK<sup>+</sup> cells in the coronal sections of P0 Cont cortex co-immunostained with QK (red) and OLIG2 (green). The proportion of QK-positive cells is shown. Scale bar = 50  $\mu$ m. Abbreviations: ChorPlex, Choroid plexus; the remaining are the same as in Figure 1A.

| Glia-enriched genes  |         |              |
|----------------------|---------|--------------|
| Gene                 | Log2 FC | QRE in 3'UTR |
| <i>Qk</i>            | -2.41   | 1            |
| <i>Gatm</i>          | -2.13   | 2            |
| <i>S100b</i>         | -1.69   | 1            |
| <i>Gng12</i>         | -1.53   | 6            |
| <i>Reep3</i>         | -1.15   | 6            |
| <i>Rab5a</i>         | -1.12   | 4            |
| <i>Abcd3</i>         | -1.12   | 1            |
| <i>Sept2</i>         | -1.06   | 4            |
| <i>Kihl5</i>         | -0.93   | 3            |
| <i>Degs1</i>         | -0.92   | 1            |
| <i>Gpm6b</i>         | -0.91   | 3            |
| <i>Scd1</i>          | -0.91   | 3            |
| <i>1810037117Rik</i> | -0.88   | 2            |
| <i>Cldnd1</i>        | -0.86   | 3            |
| <i>Vps35</i>         | -0.85   | 2            |
| <i>Abhd4</i>         | -0.81   | 1            |
| <i>Spag9</i>         | -0.79   | 5            |
| <i>Hdhd2</i>         | -0.78   | 2            |
| <i>Tmem9b</i>        | -0.67   | 1            |
| <i>Dmwd</i>          | -0.65   | 2            |
| <i>Srp14</i>         | -0.64   | 1            |
| <i>Pea15a</i>        | -0.63   | 3            |
| <i>Ankrd40</i>       | -0.62   | 4            |
| <i>Pcnp</i>          | -0.60   | 3            |
| <i>Canx</i>          | -0.60   | 2            |
| <i>Gmfb</i>          | -0.59   | 1            |
| <i>Tmem30a</i>       | -0.59   | 3            |

| Astrocyte-enriched genes |         |              |
|--------------------------|---------|--------------|
| Gene                     | Log2 FC | QRE in 3'UTR |
| <i>Vcam1</i>             | -2.36   | 1            |
| <i>Luzp2</i>             | -1.76   | 5            |
| <i>Slc1a3</i>            | -1.43   | 3            |
| <i>Sfxn5</i>             | -1.33   | 2            |
| <i>Ednrb</i>             | -1.13   | 2            |
| <i>Abhd3</i>             | -1.07   | 1            |
| <i>Ptprz1</i>            | -0.97   | 2            |
| <i>Gja1</i>              | -0.87   | 2            |
| <i>Axl</i>               | -0.81   | 1            |
| <i>Mfap3l</i>            | -0.80   | 7            |
| <i>Ddah1</i>             | -0.79   | 4            |
| <i>Spag9</i>             | -0.79   | 5            |
| <i>Aldh6a1</i>           | -0.75   | 4            |
| <i>Slc4a4</i>            | -0.71   | 4            |
| <i>Tril</i>              | -0.69   | 1            |
| <i>Tiparp</i>            | -0.66   | 3            |
| <i>Gria2</i>             | -0.65   | 7            |

| OL-enriched genes    |         |              |
|----------------------|---------|--------------|
| Gene                 | Log2 FC | QRE in 3'UTR |
| <i>Qk</i>            | -2.41   | 1            |
| <i>Gatm</i>          | -2.13   | 2            |
| <i>S100b</i>         | -1.69   | 1            |
| <i>Gng12</i>         | -1.53   | 6            |
| <i>Il1rap</i>        | -1.42   | 4            |
| <i>Ugt8a</i>         | -1.28   | 4            |
| <i>Prkcq</i>         | -1.23   | 1            |
| <i>Reep3</i>         | -1.15   | 6            |
| <i>Abcd3</i>         | -1.12   | 1            |
| <i>Sept2</i>         | -1.06   | 4            |
| <i>Kihl5</i>         | -0.93   | 3            |
| <i>Degs1</i>         | -0.92   | 1            |
| <i>Gpm6b</i>         | -0.91   | 3            |
| <i>Scd1</i>          | -0.91   | 3            |
| <i>1810037117Rik</i> | -0.88   | 2            |
| <i>Cldnd1</i>        | -0.86   | 3            |
| <i>Vps35</i>         | -0.85   | 2            |
| <i>Gpr155</i>        | -0.84   | 1            |
| <i>Plekhh1</i>       | -0.83   | 1            |
| <i>Abhd4</i>         | -0.81   | 1            |
| <i>Hdhd2</i>         | -0.78   | 2            |
| <i>Tmem9b</i>        | -0.67   | 1            |
| <i>Omg</i>           | -0.67   | 1            |
| <i>Sbds</i>          | -0.66   | 1            |
| <i>Dmwd</i>          | -0.65   | 2            |
| <i>Srp14</i>         | -0.64   | 1            |
| <i>Pea15a</i>        | -0.63   | 3            |
| <i>Ankrd40</i>       | -0.62   | 4            |
| <i>Pcnp</i>          | -0.60   | 3            |
| <i>Canx</i>          | -0.60   | 2            |
| <i>Gmfb</i>          | -0.59   | 1            |
| <i>Tmem30a</i>       | -0.59   | 3            |

| OPC-enriched genes |         |              |
|--------------------|---------|--------------|
| Gene               | Log2 FC | QRE in 3'UTR |
| <i>Luzp2</i>       | -1.76   | 5            |
| <i>Cav2</i>        | -1.68   | 2            |
| <i>Pcdh15</i>      | -1.46   | 4            |
| <i>Il1rap</i>      | -1.42   | 4            |
| <i>Pdgfra</i>      | -1.26   | 1            |
| <i>Prkcq</i>       | -1.23   | 1            |
| <i>Ednrb</i>       | -1.13   | 2            |
| <i>Tmem100</i>     | -1.12   | 1            |
| <i>Ccnd1</i>       | -1.05   | 1            |
| <i>Ampd3</i>       | -1.03   | 2            |
| <i>Ptprz1</i>      | -0.97   | 2            |
| <i>Cadm2</i>       | -0.95   | 4            |
| <i>Spon1</i>       | -0.94   | 5            |
| <i>Gpm6b</i>       | -0.91   | 3            |
| <i>Fchs2</i>       | -0.90   | 1            |
| <i>Chpt1</i>       | -0.89   | 2            |
| <i>Spred1</i>      | -0.87   | 8            |
| <i>Gpr155</i>      | -0.84   | 1            |
| <i>Galc</i>        | -0.84   | 3            |
| <i>Timp4</i>       | -0.82   | 1            |
| <i>Ddah1</i>       | -0.79   | 4            |
| <i>Fubp3</i>       | -0.76   | 1            |
| <i>Tspan12</i>     | -0.74   | 3            |
| <i>Cx3cl1</i>      | -0.72   | 1            |
| <i>Lhfpl3</i>      | -0.70   | 7            |
| <i>Snx27</i>       | -0.70   | 6            |
| <i>Omg</i>         | -0.67   | 1            |
| <i>Gria2</i>       | -0.65   | 7            |
| <i>Taf9b</i>       | -0.64   | 1            |
| <i>Ipo5</i>        | -0.64   | 2            |
| <i>Farp1</i>       | -0.64   | 1            |
| <i>Nckap1</i>      | -0.63   | 1            |

| Neuron-enriched genes |         |              |
|-----------------------|---------|--------------|
| Gene                  | Log2 FC | QRE in 3'UTR |
| <i>Wnt7b</i>          | -1.34   | 1            |
| <i>Cx3cl1</i>         | -0.72   | 1            |

Supplementary Table S1. Downregulated genes with QRE in *Qk*-KO NSCs induced glial differentiation, relating to Figure 5, 6

## Experimental Procedures (continued)

### Mice

Conditional KO mice for *Qk* were generated using the gene-trapped ES (embryonic stem) cell line EUCE0299b07 (Schnutgen et al., 2005) obtained from the European Conditional Mouse Mutagenesis Program. The gene structure of *Qk* and the targeting scheme is shown in **Figure S1A** and **S1B**. In this cell line, the *Qk* gene is trapped after exon 2, resulting in the deletion of > 85.2% of the coding region (in the case of *Qk-6*) beginning from the middle portion of the QUA1 domain at the N-terminus. The generation of chimeric mice is described elsewhere (Takeuchi et al., 2018); these mice were crossed with *CAG-FLPe* mice (RIKEN BioResource Center, Tsukuba, Japan) (Kanki et al., 2006) to inactivate gene trapping and create a floxed allele by FRT (Flp recombination target)-induced inversion. These mice were further crossed with a *Nestin-Cre* (Tronche et al., 1999) line to induce NSC-specific KO mice. Genotyping PCR was performed using genomic DNA from the tail or yolk sac. Embryonic stages were calculated using noon (12:00 PM) of the vaginal plug day as the reference time point E0.5. The scheme for gene trapping, FRT-induced inversion, Cre-induced gene trapping, and genotyping primer positions with the results of genotyping PCR are shown in **Figure S1B** and **S1C**. See manuscript for the detailed gene targeting

strategy (Schnutgen et al., 2005). Genotyping PCR was carried out to distinguish between the wild-type (WT) allele, gene-trapped allele (*Qk trap*), and floxed allele (*Qk floxed*) after FRT-induced inversion; and Cre-induced gene trapping (*Qk del*) for *Qk*. *FLPe* and *Cre* transgenes were detected by PCR with the internal control (IC) (IC: *Tcrd* for *FLPe* and *IL-2* for *Cre*) (**Figure S1C**). Mice of *wt*, *wt;Nestin-Cre*, *Qk<sup>ff</sup>*, and *Qk<sup>ff</sup>+*, litter mates of heterozygous and homozygous mutant mice, were used as controls. All animal care and experiments were conducted in accordance with the U.S. National Institutes of Health Guide for the Care and Use of Laboratory Animals, and all experimental protocols were approved by the Institutional Animal Care and Use Committee of the Kyoto University Graduate School of Medicine and the RIKEN Kobe Branch.

**Primers for detection of WT, *trap*, and *f* alleles and *del***

|      |                                  |
|------|----------------------------------|
| P691 | 5'- GTGCTGCATTCAGTTACTACATCC-3'  |
| P692 | 5'- CATCACCATCGCCAGTTCTCGTCC-3'  |
| P693 | 5'- GTCCTCCGATTGACTGAGTCGC-3'    |
| P767 | 5'- ATCAGCCTCGACTGTGCCTTCTAG -3' |
| P768 | 5'- TCCAGCCCTCACTCCTTCTCTAG-3'   |
| P769 | 5'- CAAGGAAACCCTGGACTACTGCG-3'   |

### Primers for detection of *CAG-FLPe* with internal control

|         |                                       |
|---------|---------------------------------------|
| P0087-2 | 5'-GCTCTAGAGCCTCTGCTAACCATGTTCATG-3'  |
| P720    | 5'-TCCATGAGTGAACGAACCTGGTCGAAATCAG-3' |
| P715    | 5'-CTAGGCCACAGAATTGAAAGATCT-3'        |
| P716    | 5'-GTAGGTGGAAATTCTAGCATCATCC-3'       |

### Primers for detection of *Nestin-Cre* with internal control

|      |                                       |
|------|---------------------------------------|
| P719 | 5'-GAAGCCGAGTCTCAGAGAATTTGAGTGTG-3'   |
| P720 | 5'-TCCATGAGTGAACGAACCTGGTCGAAATCAG-3' |
| P715 | 5'-CTAGGCCACAGAATTGAAAGATCT-3'        |
| P716 | 5'-GTAGGTGGAAATTCTAGCATCATCC-3'       |

## DNA Constructs

### 3'UTR QRE reporter constructs

To construct 3'UTR QRE reporter vectors, the 3'UTR sequences of *Rab5a*, *Snx5*, *Cbl*, and *Cav1* genes were isolated from C57BL/6 genomic DNA and ligated into the 3'-end of *eGFP* cDNA in pcDNA3.1(+) at the *XhoI/EcoRI* or *XhoI/BamHI* sites. Vectors in which QRE in the 3'UTR were mutated from ACTAAH (H = not G) to TCGAGH were generated by Gene Synthesis (Eurofins Genomics, Ebersberg, Germany). The following primers were used for amplification of the 3'UTR sequences:

|                    |                                                      |
|--------------------|------------------------------------------------------|
| Rab5a-F<br>(P1131) | 5'-CAC CCT CGA GAC CAC CAG GTT GTT TTC TGT TTG AG-3' |
| Rab5a-R<br>(P1132) | 5'-TTG GAT CCA GCC TTT ATA CAA GTC CGT TT-3'         |
| Snx5-F<br>(P1163)  | 5'-CAC CCT CGA GCC TGT CTA CTC TGA AGG ACA CC-3'     |
| Snx5-R<br>(P1164)  | 5'-TTG AAT TCG TTG TGA AAT CTT TTC TTA AAT AAA TC-3' |
| Cbl-F<br>(P1157)   | 5'-CAC CCT CGA GCA CAT CTC TCC CTG CCA CGG CTT C-3'  |
| Cbl-R<br>(P1158)   | 5'-TTG GAT CCA TGT ATT TAT TTA ATG CTC TAC CTG-3'    |
| Cav1-F<br>(P1169)  | 5'-CAC CCT CGA GGG GAC ATT TCA AGG ATG AAA GG-3'     |
| Cav1-R<br>(P1170)  | 5'-TTG GAT CCG CGT AAC TGT TAA ACA ATT TTA TTG TG-3' |

### ***Qk* expression vectors**

The full-length mouse *Qk-7* coding sequence (NM\_021881.2) was isolated from P7 mouse brain cDNA and cloned into the pENTR D-Topo vector (Thermo Fisher Scientific, Waltham, MA, USA). To construct the *Qk-6* expression vector, a PCR-based modification was introduced into the C-terminus of *Qk-7* cDNA to generate the full-length *Qk-6* coding sequence (NM\_001159516.1) and the fragment was cloned into the pCAG-3×FLAG-DEST vector. To generate a *Qk-6* expression vector with QUA1 deletion (*Qk-6* ΔQUA1) (Chen and Richard, 1998; Ryder and Massi, 2010), a PCR-based deletion was introduced into the N-terminal domain of the full-length *Qk-6* coding

sequence and the fragment was cloned into the pcDNA5\_FRT-TO-3×FLAG-DEST vector.

### **Primary neural stem/precursor cell (NS/PC) culture and differentiation into astrocytes**

NS/PCs were isolated from E14 mouse embryo (male and female) cortices. The tissue samples were triturated in Hank's balanced salt solution (Sigma-Aldrich, St. Louis, MO, USA; H2387). Dissociated cells were cultured for 4 days prior to experiments in N2 medium composed of Dulbecco's Modified Eagle's Medium (DMEM)/F12 (Gibco, Grand Island, NY, USA; 124000-24), 25 µg/ml insulin (Wako Pure Chemical Industries, Osaka, Japan; 097-06474), 100 µg/ml apo-transferrin (Nacalai Tesque, Kyoto, Japan; 34401-55), 16 µg/ml putrescine dihydrochloride (Sigma-Aldrich; P5780), 30 µM sodium selenite (Sigma-Aldrich; S5261), and 20 µM progesterone (Sigma-Aldrich; P0130) supplemented with 10 ng/ml bFGF (PeproTech, Rocky Hill, NJ, USA; 100-18B) on culture dishes coated with poly-L-ornithine (Sigma-Aldrich; P3655) and fibronectin (Sigma-Aldrich; F4759) at 37 °C and 5% CO<sub>2</sub>. To induce glial differentiation, cells were seeded on dishes in N2 medium lacking bFGF but containing 10% fetal bovine serum (FBS).

## **Cell culture, transfection of Qk cDNA and 3'UTR reporter constructs, and quantitative (q)PCR**

HeLa cells were cultured in DMEM containing 10% FBS, glutamine, and penicillin/streptomycin at 37 °C and 5% CO<sub>2</sub>. The cells were transfected with the 3'UTR reporter constructs and Qk cDNA using Lipofectamine 2000 (Life Technologies, Carlsbad, CA, USA) according to the manufacturer's instructions, followed by incubation for 48 h. Total RNA was extracted from the cells and used to synthesize cDNA as previously described (Takeuchi et al., 2010); qPCR was performed using FastStart Universal SYBR Green Master (Rox) (Roche Diagnostics, Basel, Switzerland) on a StepOnePlus Real-Time PCR System (Applied Biosystems, Foster City, CA, USA). For the comparison of mRNA expression from different reporter vectors, each vector was co-transfected with Qk-6 lacking the QUA1 domain (Qk ΔQUA1), whose RNA binding activity is abolished (Chen and Richard, 1998; Ryder and Massi, 2010). mRNA levels were used as a negative control for Qk induction, as well as for normalization. Transfection efficiency was monitored using the SV40-Neo gene in the vector as an IC.

The PCR primer pairs used for qPCR were as follows:



|                        |                                       |
|------------------------|---------------------------------------|
| FLAG-eGFP-F<br>(P1133) | 5'-ATG GAC TAC AAG GAC GAC GAT GAC-3' |
| FLAG-eGFP-R<br>(P0088) | 5'-ACG TCG CCG TCC AGC TCG AC-3'      |
| Neomycin-F<br>(P1184)  | 5'-GAT CTC CTG TCA TCT CAC CTT GC-3'  |
| Neomycin-R<br>(P1185)  | 5'-CTT GGT GGT CGA ATG GGC AGG TAG-3' |

### **BrdU labeling and immunohistochemistry**

Brain tissue sections were fixed with 4% paraformaldehyde in phosphate-buffered saline (PBS) (pH 7.4) for 15 min at room temperature, then subjected to heat-induced antigen retrieval in 10 mM citrate buffer (pH 6.0) using microwave 500V for 10 min. After permeabilization and blocking with blocking buffer at room temperature, the sections were incubated overnight at 4 °C, or for 2 h at room temperature, with primary antibodies, followed by secondary or tertiary antibodies for 2 h at room temperature. BrdU labeling was performed as previously described (Takeuchi et al., 2007). Briefly, pregnant mice were intraperitoneally injected with BrdU (40 mg/kg) and 1 h later embryos were collected, sectioned, and immunolabeled as described in a previous report (Tuttle et al., 1999). The primary antibodies were as follows: rat monoclonal anti-BrdU (1:100, cat. no. BU1/75[ICR1]; Novas Biologicals, Littleton, CO, USA); mouse anti-Acsbg1 (1:400, cat. no. ab118154), and rabbit anti-CNP1 (1:200, cat. no. ab6319) (all from Abcam, Cambridge,

UK); mouse anti-GFAP (1:400, cat. no. G 3893; Sigma-Aldrich); rabbit anti-QK (1:200, cat. no. IHC-00574; Bethyl Laboratories, Montgomery, TX, USA); mouse monoclonal anti-Tuj1 (1:500, cat. no. MMS-435P) and mouse anti-MBP (1:800, cat. no. SMI-99P) (from Covance, Princeton, NJ, USA); rabbit anti-PDGFR $\alpha$  (1:1000; cat. no. sc-338, Santa Cruz Biotechnology, Santa Cruz, CA, USA); and mouse anti-QK (1:200, cat. no. MABN624), rabbit anti-SOX2 (1:800, cat. no. AB5603), mouse anti-OLIG2 (1:1000, cat. no. MABN50), and rabbit anti-NG2 (1:200, cat. no. AB5320) (all from Merck, Darmstadt, Germany). The secondary antibodies were as follows: goat anti-rabbit Alexa Fluor 488 (1:200, cat. no. A-11070), goat anti-rabbit Alexa Fluor 555 (1:200, cat. no. A-21430), donkey anti-rat Alexa Fluor 488 (1:200, cat. no. A-21208), donkey anti-mouse Alexa Fluor 647 (1:200, cat. no. A-31571), goat anti-mouse Alexa Fluor 488 (1:200, cat. no. A-11001), and Alexa Fluor 488 and Alexa Fluor 555 streptavidin conjugate (both 1:200, cat. nos. S11223 and S32355) (all from Thermo Fisher Scientific); and biotinylated goat anti-rabbit IgG (1:100, cat. no. BA-1000; Vector Laboratories, Burlingame, CA, USA). Nissl staining was performed according to standard procedures with 0.1% cresyl violet solution. Sections were incubated with Hoechst 33258 (1:500, cat. no. 04928-92; Nacalai Tesque) for nuclear staining and mounted using ProLong Gold Antifade Reagent (Thermo Fisher Scientific). Fluorescence images were acquired on a DM6000 digital microscope system or TCS SP8

confocal laser scanning microscopy (Leica, Wetzlar, Germany). For quantification, all digital images were processed using ImageJ software (<https://imagej.nih.gov/ij/docs/index.html>). We counted PDGF-R $\alpha$ <sup>+</sup>, OLIG2<sup>+</sup>, ACSBG1<sup>+</sup>, and GFAP<sup>+</sup> cells in the dorsal to the lateral palliums of the frontal cerebrums: cortical strips 500  $\mu$ m wide for P0 and 1000  $\mu$ m for P7 from the frontal cortices per each brain.

### **Immunocytochemistry**

Cells were fixed at the indicated days *in vitro* (DIV) with 4% paraformaldehyde in PBS, permeabilized and blocked with blocking buffer (3% FBS and 0.1% Triton X-100 in PBS). The cells were probed with the following antibodies: rabbit anti-SOX2 (1:400) and mouse anti-ACSBG1 (1:400), followed by goat anti-rabbit Alexa Fluor 488 (1:800, cat. no. A-11008; Thermo Fisher Scientific) and goat anti-mouse Alexa Fluor 555 (1:800). Sections were incubated with Hoechst 33342 (1:500) for nuclear staining and mounted using ProLong Gold Antifade Reagent. Fluorescence images were acquired using a DM6000 digital microscope system or TCS SP8 confocal laser scanning microscopy (Leica, Wetzlar, Germany). For quantification, all digital images were processed using ImageJ software (<https://imagej.nih.gov/ij/docs/index.html>).

## **Western blotting**

Cerebral cortices were isolated from Cont and *Qk-KO* embryos, proteins were extracted using sample buffer (Nacalai Tesque, Kyoto, Japan), and the lysates were denatured at 95 °C for 3 min and sonicated. Protein concentrations were quantified with Pierce 660nm Protein Assay Reagent and Ionic Detergent Compatibility Reagent for Pierce 660nm Protein Assay Reagent (Thermo Fisher Scientific). They were then resolved by SDS-PAGE (SuperSep Ace gel; Wako Pure Chemical Industries) and transferred to a polyvinylidene difluoride membrane (Pall Corporation, Port Washington, NY, USA). Antibody reactions were performed with Can Get Signal immunoreaction enhancer solution (Toyobo, Osaka, Japan). Immunoreactivity was visualized with Chemi-Lumi One Super (Nacalai Tesque) or ImmunoStar LD (Wako Pure Chemical Industries) and a ChemiDoc MP imaging system (Bio-Rad, Hercules, CA, USA). The following primary antibodies were used in this study: rabbit anti-QK (1:4000), mouse anti-GFAP (1:20000), mouse monoclonal anti-ACSBG1 (1:4000), mouse monoclonal anti-OLIG2 (1:2000), rabbit anti-PDGF-R $\alpha$  (1:2000), and mouse monoclonal  $\alpha$ TUBULIN (1:1000 or 1:5000, cat. no. #2125, Cell Signaling Technology, Danvers, MA, USA). Horseradish peroxidase-conjugated anti-rabbit IgG (cat. no. NA934) and anti-mouse IgG (cat. no. ab5887) were from GE Healthcare Life Sciences (Pittsburgh, PA, USA) and Abcam, respectively.

### **Exon Array analysis of NSC- and neuron-specific layers**

Cranial regions were isolated from E15.5 C57BL/6 mouse embryos, embedded in OCT (optimal cutting temperature) compound (Sakura Finetechnical Co., Tokyo, Japan), frozen, and sectioned at a thickness of 20  $\mu\text{m}$  on a cryostat (CM-3050; Leica). The sections were collected on MembraneSlides (PEN membrane 2.0  $\mu\text{m}$ ; Leica) and stained with Arcture HistoGene Staining Solution (Thermo Fisher Scientific) under RNase-free conditions according to the manufacturer's instructions. The lower and upper areas of the entire cortex (harboring NSC- and neuron-specific regions, respectively) from rostral to caudal were isolated using a laser capture microdissection system (LMD6; Leica) (scheme in **Figure 1A**). Total RNA was isolated from three separate brains ( $n = 3$  each for upper and lower regions) using the RNeasy Micro kit (Qiagen) and subjected to Exon Array analysis. The quality of extracted RNA was evaluated with an Agilent RNA 6000 Nano and BioAnalyzer; the RNA integrity number (RIN) was 8.60–9.40. cDNA labeling, hybridization, and signal acquisition of the GeneChip Mouse Exon 1.0 ST Exon Array (Affymetrix, Santa Clara, CA, USA) were performed as previously described (Ishigaki et al., 2012).

### **Bioinformatics analysis of exon array data**

Bioinformatics analysis of exon array data was performed as previously described (Yamashita et al., 2012). Visualization and cluster analysis of expression values were performed with MultiExperiment Viewer (Saeed et al., 2006) using the probe set information provided by Affymetrix. Data were normalized with the Sketch-Quantile method implemented in Affymetrix Expression Console software.

### **Comparative analysis of RNA-seq data**

RNA profiles were then determined from mRNA-seq data (from polyA-selected mRNA). mRNA-seq reads were subjected to quality control; reads from rRNA/tRNA or repetitive regions (Bao et al., 2015), average quality scores  $< 17$ , and length  $< 50$  nt were filtered out. Those that passed the quality control were mapped to the *Mus musculus* genome (mm10) with the STAR aligner (v.2.4.1d) (Dobin et al., 2013). The genome sequence was indexed with splicing junction information from Ensembl v.83. For quantification of gene expression levels, we calculated transcripts per millions (TPM) values for each locus using RSEM (v.1.3.0). We initially calculated read per kilobase 10 million (RPK10M) for each gene and scaled these values into TPM values. A gene was defined as expressed when the TPM value was  $\geq 2$ . For differential gene expression analysis, we used DEseq2 (Love et

al., 2014). Genes that met the following criteria were considered as differentially expressed:  $\text{Log}_2 \text{FC} > 0.58$  ( $\text{FC} > 1.5$ ) or  $\text{Log}_2 \text{FC} < -0.58$  ( $\text{FC} < 0.67$ ); an adjusted  $p$ -value  $< 0.01$ ; raw tag count  $\geq 31$  for at least one condition (Cont or *Qk-KO*); and TPM  $\geq 2$  for at least one condition for primary cells. To evaluate the change in gene expression, we generated cell-type enriched gene lists for astrocytes, OLs, OPCs, glia (astrocytes + OPCs + OLs), or neurons referring the neural and glial cell type-specific transcriptome databases of the mouse cerebral cortex (Zhang et al., 2014): the 500 most enriched genes in the indicated cell types were listed. The raw data from mRNA-seq were deposited in the Gene Expression Omnibus (GEO) under accession number GSE117018.

### **Analysis of Single-cell transcriptomic data from developing mouse neocortex.**

To detect in a full extent *Qk*-expressing cells, we re-analyzed data from single-cell RNA-seq (scRNA-seq) obtained by the Zylka's group in the context of mouse P0 cerebral cortex (Loo et al., 2019) (NCBI GEO accession No; GSE12333). To draw boxplots representing the gene expression values in each cell types, raw read counts were converted into log-normalized expression values using the published scripts2 (<https://github.com/jeremysimon/MouseCortex>). The cell types were defined as per the original annotation (Loo et al., 2019). To draw the pie-chart referent to *Qk*-expressing cells'

distribution, only cells showing  $Q_k$  log-normalized expression values  $\geq 2.0$  were considered as  $Q_k$ -positive cells.

### **Data and code availability**

All data are available from the GEO under the accession number GSE117018. In-house scripts were used to calculate RPKM and TPM. All data and scripts not included here are available from the corresponding author upon reasonable request.

### **GSEA**

Expressed genes (TPM  $\geq 2.0$ , see “Comparative analysis of RNA-seq data from brains and NSCs” in METHODS) served as the input for GSEA (<http://software.broadinstitute.org/gsea/index.jsp>) (Subramanian et al., 2005), using GSEA v3.0 with default parameters (except for permutation type, which was changed to “gene set”). Cell type-specific gene lists were used for analysis (see “Comparative analysis of RNA-seq data from NSCs ” in the Supplemental Material and Methods section).

### **Gene Ontology**

Gene Ontology analysis was performed using the DAVID (Database for Annotation,



Visualization, and Integrated Discovery) Bioinformatics Resources (<http://david.niaid.nih.gov>). For background genes, we used all expressed genes from our RNA-seq data (see “Comparative analysis of RNA-seq data from brains and NSCs” in the Supplemental Material and Methods section).

### **Statistics**

Values are presented as mean  $\pm$  SD or SEM. Statistical analyses were performed by two-tailed Student's or Welch's *t*-test using JMP software. Probabilities of  $p < 0.05$  were considered significant. Statistical analysis of RNA-seq was evaluated with DESeq2 to analyze differentially expressed genes (<http://www.bioconductor.org/packages/release/bioc/html/DESeq2.html>) (Love et al., 2014). Statistical analysis of GSEA data was evaluated with GSEA 2.0 (<http://software.broadinstitute.org/gsea/index.jsp>) (Subramanian et al., 2005) with default parameters (except for the permutation type, which was changed to “gene set”).

### **Supplemental References**

- Bao, W., Kojima, K.K., and Kohany, O. (2015). Repbase Update, a database of repetitive elements in eukaryotic genomes. *Mob DNA* 6, 11.
- Chen, T., and Richard, S. (1998). Structure-function analysis of Qk1: a lethal point mutation in mouse quaking prevents homodimerization. *Mol. Cell. Biol.* 18, 4863-4871.

Dobin, A., Davis, C.A., Schlesinger, F., Drenkow, J., Zaleski, C., Jha, S., Batut, P., Chaisson, M., and Gingeras, T.R. (2013). STAR: ultrafast universal RNA-seq aligner. *Bioinformatics* *29*, 15-21.

Ishigaki, S., Masuda, A., Fujioka, Y., Iguchi, Y., Katsuno, M., Shibata, A., Urano, F., Sobue, G., and Ohno, K. (2012). Position-dependent FUS-RNA interactions regulate alternative splicing events and transcriptions. *Sci. Rep.* *2*, 529.

Kanki, H., Suzuki, H., and Itohara, S. (2006). High-efficiency CAG-FLPe deleter mice in C57BL/6J background. *Exp. Anim.* *55*, 137-141.

Loo, L., Simon, J.M., Xing, L., McCoy, E.S., Niehaus, J.K., Guo, J., Anton, E.S., and Zylka, M.J. (2019). Single-cell transcriptomic analysis of mouse neocortical development. *Nat Commun* *10*, 134.

Love, M.I., Huber, W., and Anders, S. (2014). Moderated estimation of fold change and dispersion for RNA-seq data with DESeq2. *Genome Biol.* *15*, 550.

Ryder, S.P., and Massi, F. (2010). Insights into the structural basis of RNA recognition by STAR domain proteins. *Adv. Exp. Med. Biol.* *693*, 37-53.

Saeed, A.I., Bhagabati, N.K., Braisted, J.C., Liang, W., Sharov, V., Howe, E.A., Li, J., Thiagarajan, M., White, J.A., and Quackenbush, J. (2006). TM4 microarray software suite. *Methods Enzymol.* *411*, 134-193.

Schnutgen, F., De-Zolt, S., Van Sloun, P., Hollatz, M., Floss, T., Hansen, J., Altschmied, J., Seisenberger, C., Ghyselinck, N.B., Ruiz, P., *et al.* (2005). Genomewide production of multipurpose alleles for the functional analysis of the mouse genome. *Proc. Natl. Acad. Sci. U. S. A.* *102*, 7221-7226.

Subramanian, A., Tamayo, P., Mootha, V.K., Mukherjee, S., Ebert, B.L., Gillette, M.A., Paulovich, A., Pomeroy, S.L., Golub, T.R., Lander, E.S., *et al.* (2005). Gene set enrichment analysis: a knowledge-based approach for interpreting genome-wide expression profiles. *Proc. Natl. Acad. Sci. U. S. A.* *102*, 15545-15550.

Takeuchi, A., Hamasaki, T., Litwack, E.D., and O'Leary, D.D. (2007). Novel IgCAM, MDGA1, expressed in unique cortical area- and layer-specific patterns and transiently by distinct forebrain populations of Cajal-Retzius neurons. *Cereb. Cortex* *17*, 1531-1541.

Takeuchi, A., Hosokawa, M., Nojima, T., and Hagiwara, M. (2010). Splicing reporter mice revealed the evolutionally conserved switching mechanism of tissue-specific alternative exon selection. *PLoS One* *5*, e10946.

Takeuchi, A., Iida, K., Tsubota, T., Hosokawa, M., Denawa, M., Brown, J.B., Ninomiya, K., Ito, M., Kimura, H., Abe, T., *et al.* (2018). Loss of Sfpq Causes Long-Gene Transcriptopathy in the Brain. *Cell Rep.* *23*, 1326-1341.

Tronche, F., Kellendonk, C., Kretz, O., Gass, P., Anlag, K., Orban, P.C., Bock, R., Klein, R., and Schutz, G. (1999). Disruption of the glucocorticoid receptor gene in the nervous system results in reduced anxiety. *Nat. Genet.* *23*, 99-103.

Tuttle, R., Nakagawa, Y., Johnson, J.E., and O'Leary, D.D. (1999). Defects in thalamocortical axon pathfinding correlate with altered cell domains in Mash-1-deficient mice. *Development* *126*, 1903-1916.

Yamashita, Y., Matsuura, T., Shinmi, J., Amakusa, Y., Masuda, A., Ito, M., Kinoshita, M., Furuya, H., Abe, K.,

Ibi, T., *et al.* (2012). Four parameters increase the sensitivity and specificity of the exon array analysis and disclose 25 novel aberrantly spliced exons in myotonic dystrophy. *J. Hum. Genet.* 57, 368-374.

Zhang, Y., Chen, K., Sloan, S.A., Bennett, M.L., Scholze, A.R., O'Keefe, S., Phatnani, H.P., Guarnieri, P., Caneda, C., Ruderisch, N., *et al.* (2014). An RNA-sequencing transcriptome and splicing database of glia, neurons, and vascular cells of the cerebral cortex. *J. Neurosci.* 34, 11929-11947.
